# Supplementary material for: Validation of the Cossee–Arlman mechanism for propylene oligomerization on Ni/UiO-66
Source: Royal Society of Chemistry journal article supplement (doi:10.1039/d3cy00570d), 2023-01-01
Supplement: d3cy00570d1.pdf [file d3cy00570d1.pdf]

## Supporting Information

### Validation of the Cossee-Arlman Mechanism for Propylene Oligomerization on Ni/UiO-66

Benjamin Yeh,<sup>a</sup> Saumil Chheda,<sup>a,b</sup> Jian Zheng,<sup>c</sup> Julian Schmid,<sup>c</sup> Laura Löbbert,<sup>d</sup> Ricardo Bermejo-Deval,<sup>d</sup> Oliver Y. Gutiérrez,<sup>c</sup> Johannes A. Lercher,<sup>c,d</sup> Laura Gagliardi,<sup>c</sup> and Aditya Bhan<sup>a,\*</sup>

<sup>a</sup> Department of Chemical Engineering and Materials Science, University of Minnesota-Twin Cities, 421 Washington Avenue SE, Minneapolis, Minnesota 55455, United States

<sup>b</sup> Department of Chemistry, Chemical Theory Center, and Supercomputing Institute, University of Minnesota-Twin Cities, 207 Pleasant Street SE, Minneapolis, Minnesota 55455, United States

<sup>c</sup> Institute for Integrated Catalysis, Pacific Northwest National Laboratory, Richland, Washington 99352, United States

<sup>d</sup> Department of Chemistry and Catalysis Research Center, Technical University of Munich, 85748 Garching, Germany

<sup>e</sup> Department of Chemistry, The University of Chicago, Chicago, Illinois 60637, United States

\*Correspondence: [abhan@umn.edu](mailto:abhan@umn.edu)

## Contents

|                                                                                                     |           |
|-----------------------------------------------------------------------------------------------------|-----------|
| <b>S1. Propylene Oligomerization Time on Stream, Selectivities, and Kinetics on Ni UiO-66 .....</b> | <b>1</b>  |
| <b>S2. Supplemental in-situ NO Titrations.....</b>                                                  | <b>5</b>  |
| <b>S3. Supplemental XAS Data .....</b>                                                              | <b>6</b>  |
| <b>S4. Cossee-Arlman and Metallocycle Mechanisms and Rate Expressions .....</b>                     | <b>7</b>  |
| <b>S5. Supplemental DFT Calculations .....</b>                                                      | <b>14</b> |
| <b>S6. Atomic Coordinates .....</b>                                                                 | <b>19</b> |
| <b>S7. References.....</b>                                                                          | <b>60</b> |

### S1. Propylene Oligomerization Time on Stream, Selectivities, and Kinetics on Ni/Uio-66

Previously, we reported enhancements in rate on Ni/Uio-66 on-stream during ethylene oligomerization. This observation was attributed to the increase in the density of nickel sites upon exposing the catalyst to higher ethylene pressures.<sup>1</sup> We sought to determine if this phenomena occurred during propylene oligomerization to correctly normalize reaction rates. In Figure S1, the propylene pressure was increased from 5 kPa to 500 kPa and the pressure was returned to 5 kPa. No enhancement in rate was determined at 5 kPa after exposing the catalyst to higher propylene pressures (0 – 250 minutes and 750 – 1500 minutes) to suggest that nickel site densities do not increase after exposing the catalyst to high propylene pressures.

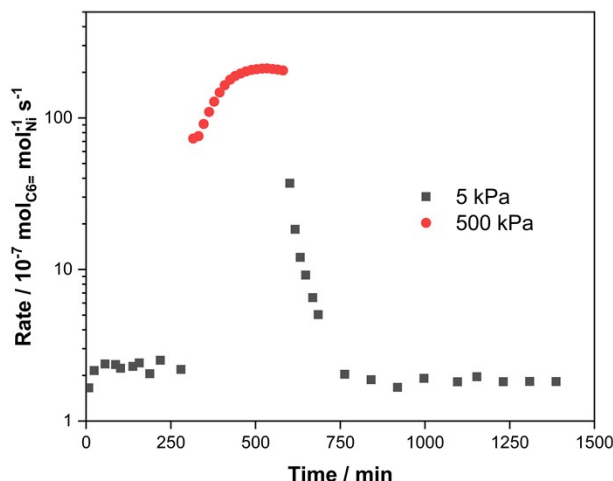

**Figure S1:** Time on stream after increasing propylene partial pressure from 5 kPa to 500 kPa and then decreasing the pressure back 5 kPa on Ni/Uio-66 at 473 K

Hexadiene formation is observed during the induction period and decreases with time on stream as hexene formation increases with time on stream before both reach steady state, as shown in Figure S2. This observation is consistent with in-situ generation of relevant nickel-hydride or nickel-alkyl intermediates required for the Cossee-Arlman mechanism.<sup>1-4</sup>

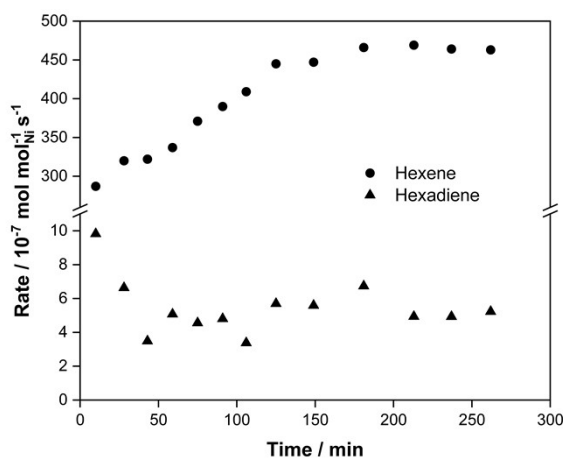

**Figure S2:** Time on stream showing hexene (●) and hexadiene (▲) formation on 80.6 mg of Ni/Uio-66 at 500 kPa of 0.83 cm<sup>3</sup> s<sup>-1</sup> of propylene at 473 K.

The stability of Ni/Uio-66 was examined further by changing propylene partial pressures with time on stream on the same catalyst at 473 K. In Figure S3, the reaction rate decreases by ~10% with time on stream at 420 kPa initially (~0-6 ks). However, after changing the propylene partial pressure to 249 kPa, 331 kPa, and returning to 420 kPa (~6-24 ks), the reference pressure, the catalyst is stable at 420 kPa, with the reaction rate at 420 kPa ~30% lower than the initial rate at 420 kPa (~0-6 ks). The partial pressure of propylene was decreased to 331 kPa (~24-30 ks) which yielded reaction rates within 10% of the previous condition at 331 kPa. After increasing partial pressure of propylene back to 420 kPa (~30-36 ks), the rate was within 10% of the reaction rate at 420 kPa at ~21-24 ks. Subsequently, after changing partial pressures of propylene to 497 kPa and 177 kPa, the rates of reaction at the reference partial pressure of 420 kPa were within 10%. In this case, we consider that rates from ~15-42 ks to be steady state rates. We note that although the catalyst appears to be stable initially (Fig. 1 in the main text), changes in process conditions and returning to the same reference process conditions shows a decrease in the rate of reaction initially, and thus, is not the steady state rate for propylene oligomerization.

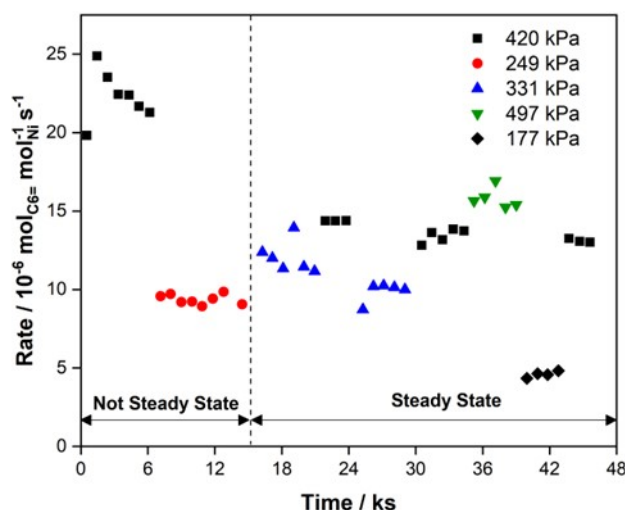

**Figure S3:** Propylene oligomerization rates as a function of time on stream on 18.2 mg of Ni/Uio-66 at 420 kPa (■), 249 kPa (●), 331 kPa (▲), 497 kPa (▼), and 177 kPa (◆) of 0.83 cm<sup>3</sup> s<sup>-1</sup> of propylene at 473 K.

In Figure S4, no effect on oligomerization rates at 259 kPa and 473 K are observed with changes in propylene flowrate (0.17 – 0.83 cm<sup>3</sup> s<sup>-1</sup>) to suggest kinetics were not measured in the presence of external mass transfer limitations or product inhibition. We note that the rate decreases by ~10% over 700 minutes. The individual hexene product selectivities are tabulated in Table S1.

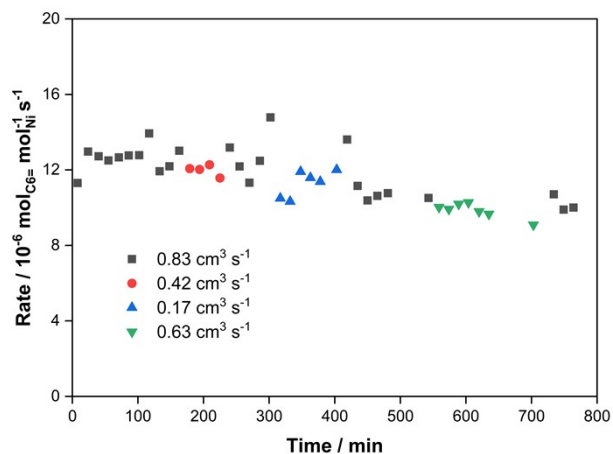

**Figure S4:** Time on stream after changing propylene flow rate ( $0.17 - 0.83 \text{ cm}^3 \text{ s}^{-1}$ ) at 259 kPa and 473 K on 13.5 mg of Ni/Uio-66

**Table S1:** Individual hexene product selectivities at 259 kPa and 473 K at 0.002% conversion on Ni/Uio-66

| Product               | Selectivity / % |
|-----------------------|-----------------|
| 4-methyl-1-pentene    | 12.3            |
| 4-methyl-2-pentene    | 2.7             |
| 2,3-dimethyl-1-butene | 6.1             |
| 2,3-dimethyl-2-butene | 9.6             |
| 1-hexene              | 7.6             |
| 2-hexene              | 22.0            |
| 3-hexene              | 16.9            |
| 2-methyl-1-pentene    | 15.6            |
| 2-methyl-2-pentene    | 7.4             |

Rates of propylene oligomerization recorded at varying times-on-stream while changing temperature (453 - 493 K) at 259 kPa and  $0.42 \text{ cm}^3 \text{ s}^{-1}$  propylene are shown in Figure S5. The rates decrease by <10% when returning the temperature back to the reference temperature (483 K). These data were used to extract the Arrhenius plot in Figure 3b in the main text.

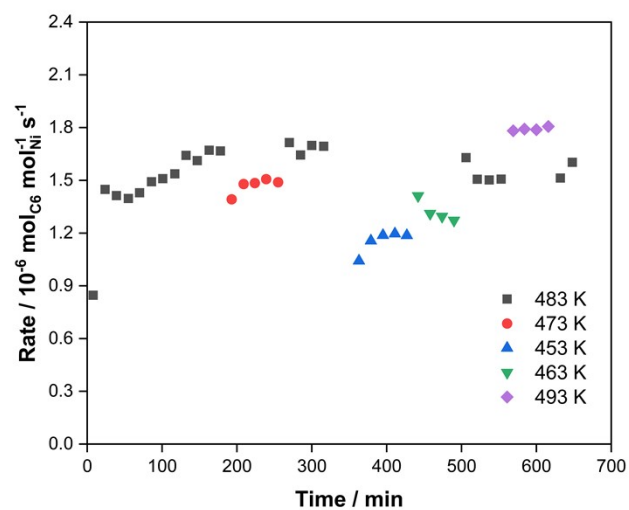

**Figure S5:** Time on stream with changes in temperature (453 – 493 K) on 259 kPa of  $0.42 \text{ cm}^3 \text{ s}^{-1}$  of propylene on 18.8 mg of Ni/Uio-66

## S2. Supplemental in-situ NO Titrations

In Figure S6 below, we present a supplemental in-situ NO titration at 500 kPa and 473 K on Ni/UiO-66 during propylene oligomerization. This titration gives  $\sim 15 \mu\text{mol}_{\text{Ni}} \text{g}_{\text{cat}}^{-1}$ , which is in good agreement with the NO titration shown in Fig. 2 in the main text.

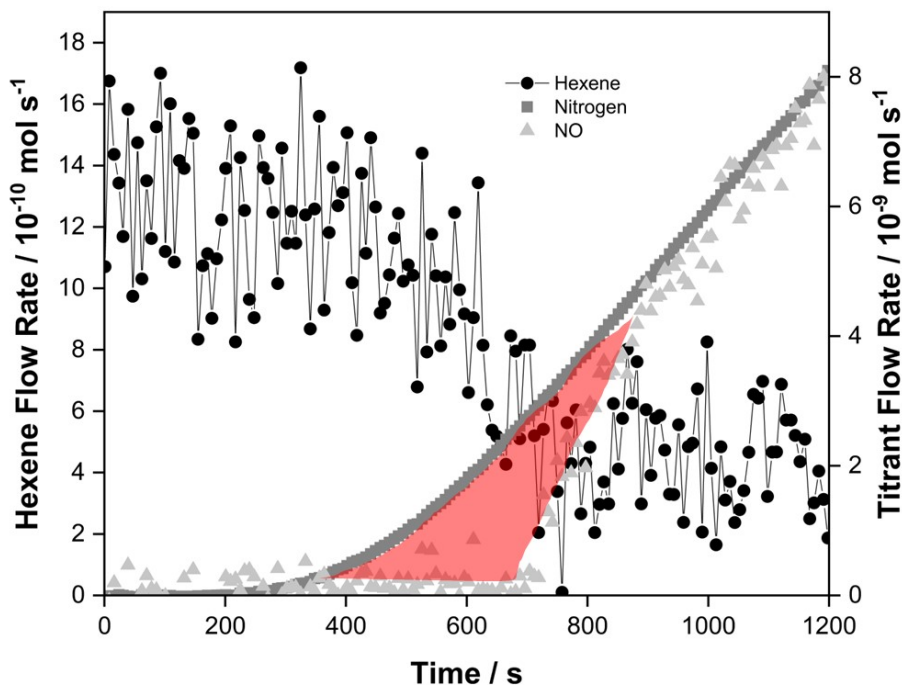

**Figure S6:** In situ NO titration showing a decrease in the rate of hexene formation (●) upon introduction of  $0.083 \text{ cm}^3 \text{ s}^{-1}$  of 1% NO (▲, light grey) and 99%  $\text{N}_2$  (■, dark gray) in  $0.83 \text{ cm}^3 \text{ s}^{-1}$  at a total pressure of 500 kPa at 473 K on 80.6 mg of Ni/UiO-66. The amount of nickel titrated is calculated by integration of the red shaded area.

### S3. Supplemental XAS Data

All XAS spectra were collected at beamline 9-3 at Stanford Synchrotron Radiation Light source (SSRL). All experiments were carried out in fluorescence mode with a passivated implanted planar silicon (PIPS) detector and with a water cooled double-crystal monochromator with Si (220) crystals. Six inch long, nitrogen-filled, ion chambers were used to measure the relative intensity of the X-ray beam before and after the sample, and before and after the reference foil. A foil located downstream of the sample was used as an internal reference to calibrate the photon energy of each spectrum. For the *in-situ* measurements the as-synthesized Ni/Uio-66 (~3 mg) was loaded in an *in-situ* XAS cell<sup>5</sup> forming an approximately 1 cm long catalyst bed located in between two quartz wool plugs inside the 1 mm OD, 0.96 mm ID, quartz capillary. Continuous extended X-ray absorption fine structure (EXAFS) spectra at the Ni-K edge (8333 eV) were collected for the as-synthesized sample in helium (0.33 cm<sup>3</sup> s<sup>-1</sup>) at ambient temperature. Continuous EXAFS spectra were collected while the temperature was ramped at 0.083 K s<sup>-1</sup> until 573 K and held for 4 hours where continuous EXAFS spectra for the Ni-K edge were obtained. After 4 hours, the reactor was allowed to cool to reaction temperature (473 K) before propylene (0.17 cm<sup>3</sup> s<sup>-1</sup>) was introduced. Continuous EXAFS spectra were collected for 3 hours, where the catalyst was assumed to be at steady state (Figure 1 in the main text). Each continuous EXAFS spectrum took approximately 2 minutes to collect, and nine EXAFS spectra were merged to improve signal to noise.

The X-ray adsorption near edge structure (XANES) and EXAFS spectra are presented in Figures S7a and S7b, respectively, for Ni/Uio-66 as-synthesized, thermally treated, and during propylene oligomerization. The pre-edge feature at 8333 eV in the XANES spectrum that persists in Ni/Uio-66 in the thermally treated sample and reaction is consistent with the pre-edge feature from  $\alpha$ -Ni-OH<sub>2</sub> to suggest that nickel remains in the 2+ oxidation state.<sup>6</sup>

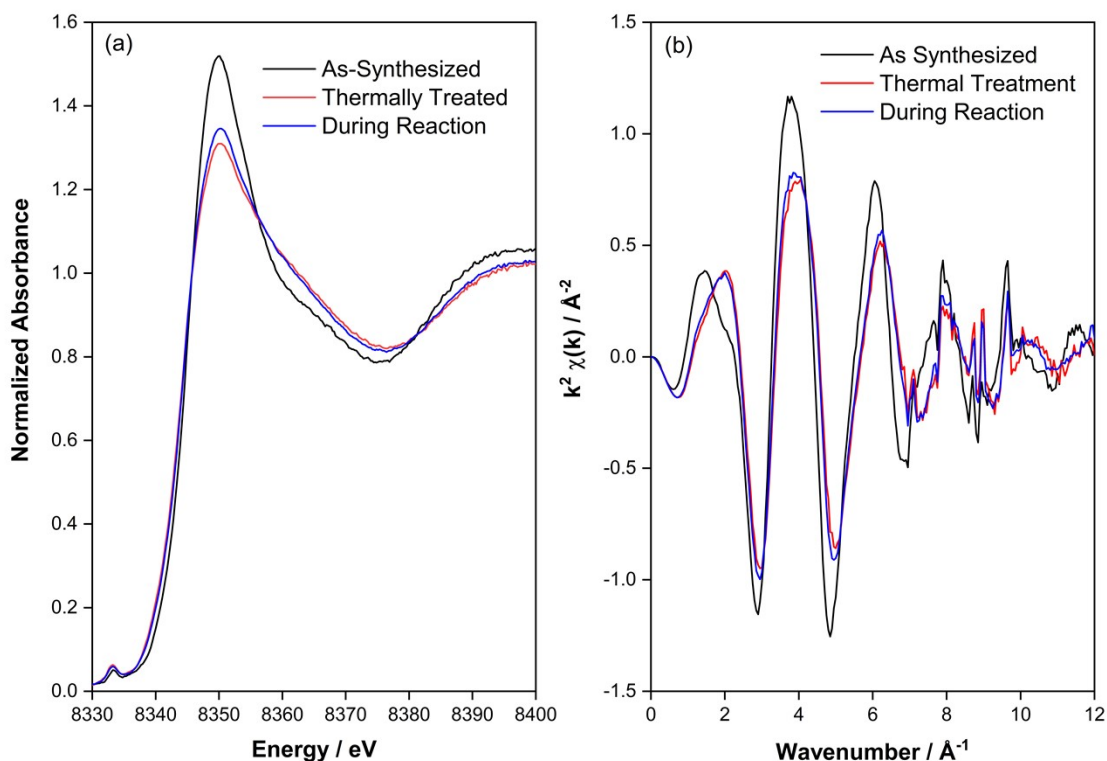

**Figure S7:** (a) XANES and (b) EXAFS data for Ni/Uio-66 as synthesized (black), after thermal treatment (red, 573 K, 0.33 cm<sup>3</sup> s<sup>-1</sup> of helium) and during propylene oligomerization (blue, 473 K, 0.17 cm<sup>3</sup> s<sup>-1</sup> of propylene)

#### S4. Cossee-Arlman and Metallacycle Mechanisms and Rate Expressions

The Cossee-Arlman has been proposed for olefin oligomerization and is shown in Scheme S1. The nomenclature is the same as the main text up until the Ni-hexyl species, and additional designation is made for Ni-hexyl species (**J**, **K**, **L**, and **M**) and the Ni-hydride species with the absorbed hexene product (**N**, **O**, **P**, and **Q**) for products **4MP**, **DMB**, **LH**, and **2MP**, respectively, in the Cossee-Arlman mechanism. This designation is made for identification of intermediates in Section S5.

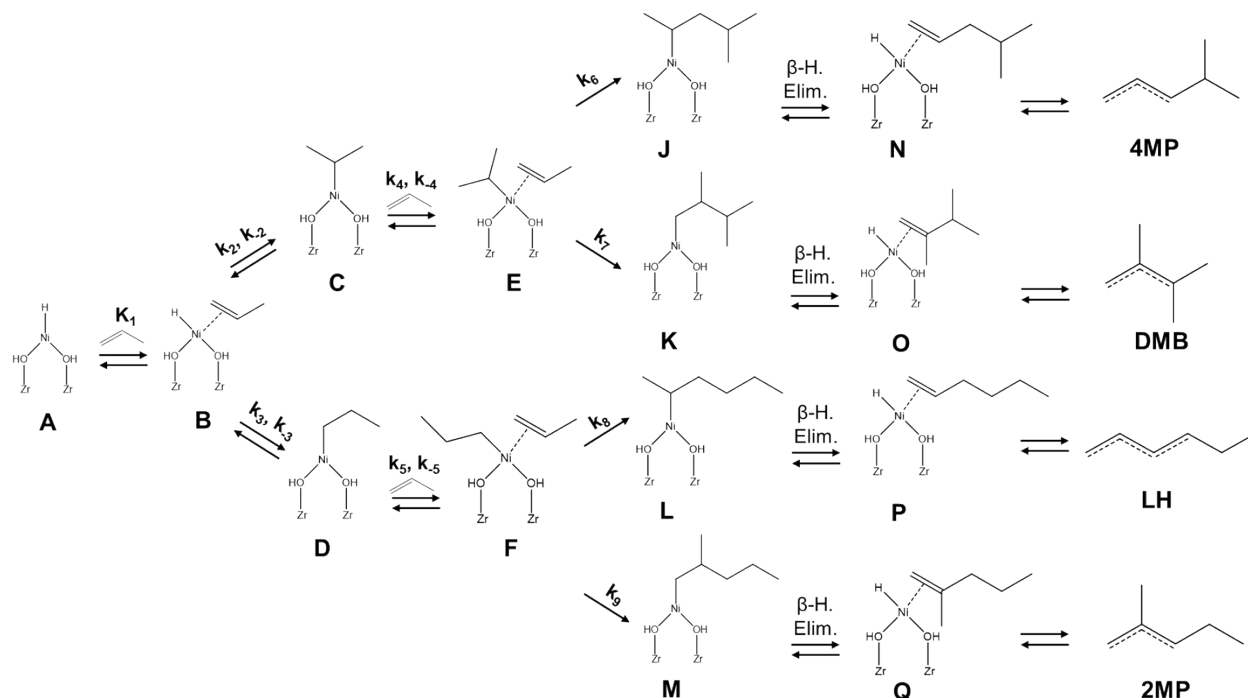

**Scheme S1:** Cossee-Arlman mechanism for propylene oligomerization on Ni/Uio-66. Entire node omitted for clarity.

For the Cossee-Arlman mechanism, the rate limiting step is the olefin insertion step ( $k_6$ ,  $k_7$ ,  $k_8$ , and  $k_9$ ).<sup>2,6-10</sup> Thus, the rate expressions for **4MP**, **DMB**, **LH**, and **2MP** are shown below in Equations S1-S4

$$r_{4MP} = k_6[E] \quad (\text{Eq. S1})$$

$$r_{DMB} = k_7[E] \quad (\text{Eq. S2})$$

$$r_{LH} = k_8[F] \quad (\text{Eq. S3})$$

$$r_{2MP} = k_9[F] \quad (\text{Eq. S4})$$

The rate expressions for the products can be written in terms of propylene pressure by assuming that the first adsorption step is quasi-equilibrated and all other intermediates are at pseudo-steady state. Assuming species **E** and **F** are at steady state, the rate expression for **E** and **F** is shown in Equation S5 and S6, respectively, with the concentration of **E** and **F** solved for in terms of concentrations of species **C** and **D**, respectively, and propylene pressure, as shown in Equations S7 and S8.

$$r_E = 0 = k_4[C] P_{C_3H_6} - k_{-4}[E] - k_6[E] - k_7[E] \quad (\text{Eq. S5})$$

$$r_F = 0 = k_5[D] P_{C_3H_6} - k_{-5}[F] - k_8[F] - k_9[F] \quad (Eq. S6)$$

$$[E] = \frac{k_4[C]P_{C_3H_6}}{k_{-4} + k_6 + k_7} \quad (Eq. S7)$$

$$[F] = \frac{k_5[D]P_{C_3H_6}}{k_{-5} + k_8 + k_9} \quad (Eq. S8)$$

The concentration of **C** and **D** can be solved for by assuming steady state on these species by solving the rate expressions shown in Equations S9 and S10, respectively. The concentrations of **C** and **D**, shown in Equations S11 and S12 respectively, are solved for by substituting Equations S7 and S8 into Equations S9 and S10, respectively.

$$r_C = 0 = k_2[B] - k_{-2}[C] + k_{-4}[E] - k_4[C]P_{C_3H_6} \quad (Eq. S9)$$

$$r_D = 0 = k_3[B] - k_{-3}[D] + k_{-5}[F] - k_5[D]P_{C_3H_6} \quad (Eq. S10)$$

$$[C] = \frac{k_2[B]}{k_{-2} - \frac{k_{-4}k_4P_{C_3H_6}}{k_{-4} + k_6 + k_7} + k_4P_{C_3H_6}} \quad (Eq. S11)$$

$$[D] = \frac{k_3[B]}{k_{-3} - \frac{k_{-5}k_5P_{C_3H_6}}{k_{-5} + k_8 + k_9} + k_5P_{C_3H_6}} \quad (Eq. S12)$$

The concentration of species **B** can be solved by assuming the first adsorption of the propylene molecule from **A** to **B** to be quasi-equilibrated, as shown in Equation S13.

$$[B] = K_1[A]P_{C_3H_6} \quad (Eq. S13)$$

By substituting Equations S13, S11, and S7 into Equations S1 and S2 and by substituting Equations S13, S12, and S8 into Equations S3 and S4, the rate expressions for the hexene products for the Cossee-Arlman mechanism can be written in terms of propylene pressure and **A**, unoccupied nickel sites, as shown in Equations S14, S15, S16, and S17, for **4MP**, **DMB**, **LH**, and **2MP**.

$$r_{4MP} = \frac{k_6k_4k_2K_1[A]P_{C_3H_6}^2}{(k_{-4} + k_6 + k_7) \left( k_{-2} - \frac{k_{-4}k_4P_{C_3H_6}}{k_{-4} + k_6 + k_7} + k_4P_{C_3H_6} \right)} \quad (Eq. S14)$$

$$r_{DMB} = \frac{k_7 k_4 k_2 K_1 [A] P_{C_3H_6}^2}{(k_{-4} + k_6 + k_7) \left( k_{-2} - \frac{k_{-4} k_4 P_{C_3H_6}}{k_{-4} + k_6 + k_7} + k_4 P_{C_3H_6} \right)} \quad (Eq. S15)$$

$$r_{LH} = \frac{k_8 k_5 k_3 K_1 [A] P_{C_3H_6}^2}{(k_{-5} + k_8 + k_9) \left( k_{-3} - \frac{k_{-5} k_5 P_{C_3H_6}}{k_{-5} + k_8 + k_9} + k_5 P_{C_3H_6} \right)} \quad (Eq. S16)$$

$$r_{2MP} = \frac{k_9 k_5 k_3 K_1 [A] P_{C_3H_6}^2}{(k_{-5} + k_8 + k_9) \left( k_{-3} - \frac{k_{-5} k_5 P_{C_3H_6}}{k_{-5} + k_8 + k_9} + k_5 P_{C_3H_6} \right)} \quad (Eq. S17)$$

The ratio of selectivities for **4MP** to **DMB** and **LH** to **2MP**, shown in Equations S18 and S19, respectively, can be solved for by either dividing Equation S14 by S15 or dividing S1 by S2 and by either dividing Equation S16 by S17 or dividing S3 by S4, respectively.

$$\frac{S_{4MP}}{S_{DMB}} = \frac{k_6}{k_7} \quad (Eq. S18)$$

$$\frac{S_{LH}}{S_{2MP}} = \frac{k_8}{k_9} \quad (Eq. S19)$$

The ratio of selectivities for LH + 2MP to 4MP + DMB shown in Equation S22 can be solved for by adding Equations S16 and S17 and by adding S14 and S15, respectively, as shown in Equations S20 and S21, and dividing Equation S20 by S21. Equation S22 shows that if propylene oligomerization occurs via the Cossee-Arlman mechanism, the ratio of LH + 2MP to 4MP + DMB is pressure dependent.

$$r_{LH} + r_{2MP} = \frac{(k_8 + k_9) k_5 k_3 K_1 [A] P_{C_3H_6}^2}{(k_{-5} + k_8 + k_9) \left( k_{-3} - \frac{k_{-5} k_5 P_{C_3H_6}}{k_{-5} + k_8 + k_9} + k_5 P_{C_3H_6} \right)} \quad (Eq. S20)$$

$$r_{4MP} + r_{DMB} = \frac{(k_6 + k_7) k_4 k_2 K_1 [A] P_{C_3H_6}^2}{(k_{-4} + k_6 + k_7) \left( k_{-2} - \frac{k_{-4} k_4 P_{C_3H_6}}{k_{-4} + k_6 + k_7} + k_4 P_{C_3H_6} \right)} \quad (Eq. S21)$$

$$S_{\frac{(LH + 2MP)}{(4MP + DMB)}} = \frac{(k_{-2} - \frac{k_{-4}k_4P_{C_3H_6}}{k_{-4} + k_6 + k_7} + k_4P_{C_3H_6})}{\left(k_{-3} - \frac{k_{-5}k_5P_{C_3H_6}}{k_{-5} + k_8 + k_9} + k_5P_{C_3H_6}\right)} * \frac{(k_8 + k_9)k_5k_3(k_{-4} + k_6 + k_7)}{(k_6 + k_7)k_4k_2(k_{-5} + k_8 + k_9)} \quad (Eq. S22)$$

The individual product selectivity expressions for 4MP, DMB, LH, and 2MP in Equations S23-S26 can be determined from Equations S14-S17

$$S_{4MP}$$

$$= \frac{\frac{k_6k_4k_2K_1[A]P_{C_3H_6}^2}{(k_{-4} + k_6 + k_7)\left(k_{-2} - \frac{k_{-4}k_4P_{C_3H_6}}{k_{-4} + k_6 + k_7} + k_4P_{C_3H_6}\right)}}{\frac{(k_6 + k_7)k_4k_2K_1[A]P_{C_3H_6}^2}{(k_{-4} + k_6 + k_7)\left(k_{-2} - \frac{k_{-4}k_4P_{C_3H_6}}{k_{-4} + k_6 + k_7} + k_4P_{C_3H_6}\right)} + \frac{(k_8 + k_9)k_5k_3K_1[A]P_{C_3H_6}^2}{(k_{-5} + k_8 + k_9)\left(k_{-3} - \frac{k_{-5}k_5P_{C_3H_6}}{k_{-5} + k_8 + k_9} + k_5P_{C_3H_6}\right)}}$$

$$S_{DMB}$$

$$= \frac{\frac{k_7k_4k_2K_1[A]P_{C_3H_6}^2}{(k_{-4} + k_6 + k_7)\left(k_{-2} - \frac{k_{-4}k_4P_{C_3H_6}}{k_{-4} + k_6 + k_7} + k_4P_{C_3H_6}\right)}}{\frac{(k_6 + k_7)k_4k_2K_1[A]P_{C_3H_6}^2}{(k_{-4} + k_6 + k_7)\left(k_{-2} - \frac{k_{-4}k_4P_{C_3H_6}}{k_{-4} + k_6 + k_7} + k_4P_{C_3H_6}\right)} + \frac{(k_8 + k_9)k_5k_3K_1[A]P_{C_3H_6}^2}{(k_{-5} + k_8 + k_9)\left(k_{-3} - \frac{k_{-5}k_5P_{C_3H_6}}{k_{-5} + k_8 + k_9} + k_5P_{C_3H_6}\right)}}$$

$$S_{LH}$$

$$= \frac{\frac{k_8k_5k_3K_1[A]P_{C_3H_6}^2}{(k_{-5} + k_8 + k_9)\left(k_{-3} - \frac{k_{-5}k_5P_{C_3H_6}}{k_{-5} + k_8 + k_9} + k_5P_{C_3H_6}\right)}}{\frac{(k_6 + k_7)k_4k_2K_1[A]P_{C_3H_6}^2}{(k_{-4} + k_6 + k_7)\left(k_{-2} - \frac{k_{-4}k_4P_{C_3H_6}}{k_{-4} + k_6 + k_7} + k_4P_{C_3H_6}\right)} + \frac{(k_8 + k_9)k_5k_3K_1[A]P_{C_3H_6}^2}{(k_{-5} + k_8 + k_9)\left(k_{-3} - \frac{k_{-5}k_5P_{C_3H_6}}{k_{-5} + k_8 + k_9} + k_5P_{C_3H_6}\right)}}$$

$$s_{2MP}$$

$$= \frac{\frac{k_8 k_5 k_3 K_1 [A] P_{C_3 H_6}^2}{(k_{-5} + k_8 + k_9) \left( k_{-3} - \frac{k_{-5} k_5 P_{C_3 H_6}}{k_{-5} + k_8 + k_9} + k_5 P_{C_3 H_6} \right)}}{\frac{(k_6 + k_7) k_4 k_2 K_1 [A] P_{C_3 H_6}^2}{(k_{-4} + k_6 + k_7) \left( k_{-2} - \frac{k_{-4} k_4 P_{C_3 H_6}}{k_{-4} + k_6 + k_7} + k_4 P_{C_3 H_6} \right)} + \frac{(k_8 + k_9) k_5 k_3 K_1 [A] P_{C_3 H_6}^2}{(k_{-5} + k_8 + k_9) \left( k_{-3} - \frac{k_{-5} k_5 P_{C_3 H_6}}{k_{-5} + k_8 + k_9} + k_5 P_{C_3 H_6} \right)}}$$

Using the parameters  $\alpha$ ,  $\beta$ ,  $\gamma$ ,  $\delta$  and  $\varepsilon$  from the main text and defined below in Equations S27-S31, Equations S23-S26 can be simplified, as shown in Equations S32-S35.

$$\alpha = k_{-2} \quad (Eq.S27)$$

$$\beta = k_{-3} \quad (Eq.S28)$$

$$\gamma = k_4 - \frac{k_{-4} k_4}{k_{-4} + k_6 + k_7} \quad (Eq.S29)$$

$$\delta = k_5 - \frac{k_{-5} k_5}{k_{-5} + k_8 + k_9} \quad (Eq.S30)$$

$$\varepsilon = \frac{(k_8 + k_9) k_5 k_3 (k_{-4} + k_6 + k_7)}{(k_6 + k_7) k_4 k_2 (k_{-5} + k_8 + k_9)} \quad (Eq.S31)$$

$$s_{4MP} = \frac{\frac{k_6}{k_6 + k_7} (\beta + \delta P_{C_3 H_6})}{\varepsilon (\alpha + \gamma P_{C_3 H_6}) + (\beta + \delta P_{C_3 H_6})} \quad (Eq.S32)$$

$$s_{DMB} = \frac{\frac{k_7}{k_6 + k_7} (\beta + \delta P_{C_3 H_6})}{\varepsilon (\alpha + \gamma P_{C_3 H_6}) + (\beta + \delta P_{C_3 H_6})} \quad (Eq.S33)$$

$$s_{LH} = \frac{\frac{k_8}{k_8 + k_9} (\alpha + \gamma P_{C_3 H_6})}{(\alpha + \gamma P_{C_3 H_6}) + \frac{1}{\varepsilon} (\beta + \delta P_{C_3 H_6})} \quad (Eq.S34)$$

$$s_{2MP} = \frac{\frac{k_9}{k_8 + k_9} (\alpha + \gamma P_{C_3 H_6})}{(\alpha + \gamma P_{C_3 H_6}) + \frac{1}{\varepsilon} (\beta + \delta P_{C_3 H_6})} \quad (Eq.S35)$$

From Equations S32-S35, the individual product selectivities for 4MP, DMB, LH, and 2MP are a function of propylene pressure. This is consistent with Figure 4 in the main text where the individual product selectivities of 4MP, DMB, LH, and 2MP are a function of propylene pressure.

While the Cossee-Arlman mechanism has been proposed for olefin oligomerization, the metallacycle mechanism, as shown in Scheme S2, has also been proposed for olefin oligomerization on nickel-based catalyst.

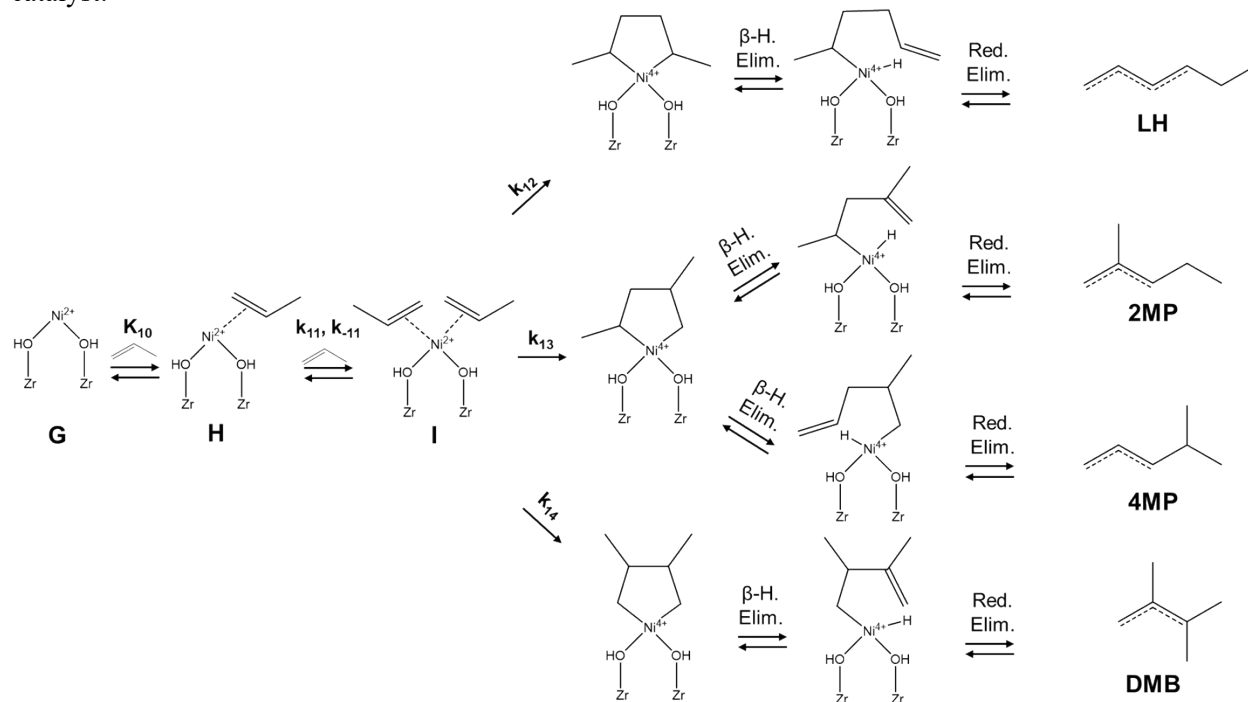

**Scheme 2:** Metallacycle mechanism for propylene oligomerization on Ni/Uio-66. Entire node omitted for clarity.

The kinetically relevant step in the metallacycle mechanism is the oxidative coupling step ( $k_{12}$ ,  $k_{13}$ , and  $k_{14}$ ).<sup>2,6,7</sup> The rate expressions for products **4MP**, **DMB**, **LH**, and **2MP** for the metallacycle mechanism are shown in Equations S36-S39.

$$r_{4MP} = k_{13}[I] \quad (\text{Eq. S36})$$

$$r_{DMB} = k_{14}[I] \quad (\text{Eq. S37})$$

$$r_{LH} = k_{12}[I] \quad (\text{Eq. S38})$$

$$r_{2MP} = k_{13}[I] \quad (\text{Eq. S39})$$

The rate expressions for the products can be written in terms of propylene pressure by assuming that the first adsorption step is quasi-equilibrated, and all other intermediates are at pseudo-steady state. Assuming that species **I** is at pseudo-steady state (Equation S40), the concentration of **I** can be solved for as shown in Equation S41.

$$r_I = 0 = k_{11}[H]P_{C_3H_6} - k_{-11}[I] - k_{12}[I] - k_{13}[I] - k_{14}[I] \quad (\text{Eq. S40})$$

$$[I] = \frac{k_{11}[H]P_{C_3H_6}}{k_{-11} + k_{12} + k_{13} + k_{14}} \quad (Eq. S41)$$

The concentration of species **H** can be solved by assuming the first adsorption of the propylene molecule from **G** to **H** to be quasi-equilibrated, as shown in Equation S42.

$$[H] = K_{10}[G]P_{C_3H_6} \quad (Eq. S42)$$

By substituting Equations S41 and S42 into Equations S36-S39, the rate expressions for the hexene products for the metallacycle mechanism can be written in terms of propylene pressure and **G**, unoccupied nickel sites, as shown in Equations S43, S44, S45, and S46, for **4MP**, **DMB**, **LH**, and **2MP**.

$$r_{4MP} = k_{13}[I] = \frac{k_{13}k_{11}K_{10}[G]P_{C_3H_6}^2}{k_{-11} + k_{12} + k_{13} + k_{14}} \quad (Eq. S43)$$

$$r_{DMB} = k_{14}[I] = \frac{k_{14}k_{11}K_{10}[G]P_{C_3H_6}^2}{k_{-11} + k_{12} + k_{13} + k_{14}} \quad (Eq. S44)$$

$$r_{LH} = k_{12}[I] = \frac{k_{12}k_{11}K_{10}[G]P_{C_3H_6}^2}{k_{-11} + k_{12} + k_{13} + k_{14}} \quad (Eq. S45)$$

$$r_{2MP} = k_{13}[I] = \frac{k_{13}k_{11}K_{10}[G]P_{C_3H_6}^2}{k_{-11} + k_{12} + k_{13} + k_{14}} \quad (Eq. S46)$$

The ratio of selectivities for the metallacycle mechanism can be found by either dividing any of the rate expressions from Equations S36-S39 by one other or dividing any of the rate expressions from Equations S43-S46 by one another. This yields ratios of selectivities that are solely a function of rate constants. This arises from **4MP**, **DMB**, **LH**, and **2MP** originating from the same intermediates, and the ratio of selectivities comes from the kinetically relevant olefin insertion step, where the metallacycle mechanism branches off. The ratio of **LH + 2MP** to **4MP + DMB** for the metallacycle mechanism is shown in Equation S47.

$$S_{\frac{(LH + 2MP)}{(4MP + DMB)}} = \frac{k_{12} + k_{13}}{k_{13} + k_{14}} \quad (Eq. S47)$$

The selectivity expressions shown in Equations S48-S51 derived from the metallacycle mechanism for **4MP**, **DMB**, **LH**, and **2MP** from the rate expressions shown in Equations S43-S46.

$$s_{4MP} = \frac{k_{13}}{k_{12} + 2k_{13} + k_{14}} \quad (Eq. S48)$$

$$s_{DMB} = \frac{k_{14}}{k_{12} + 2k_{13} + k_{14}} \quad (Eq. S49)$$

$$s_{LH} = \frac{k_{12}}{k_{12} + 2k_{13} + k_{14}} \quad (Eq.S50)$$

$$s_{2MP} = \frac{k_{13}}{k_{12} + 2k_{13} + k_{14}} \quad (Eq.S51)$$

In contrast to the pressure-dependent ratio of selectivities in Equation S22 and selectivity expressions in Equation S32-S35, the ratio of selectivities shown in Equation S47 and selectivity expressions in Equations S48-S51 are pressure-independent. Observations from Figures 4 and 5 in the main text suggest that propylene oligomerization does not proceed via the metallacycle mechanism on Ni/UiO-66.

The curvature of the ratio of product selectivities described in Equation S22 or Equation 20 in the main text is determined by the parameters  $\alpha$ ,  $\beta$ ,  $\gamma$ , and  $\delta$  (Equations 13-17 in the main text). By taking the first derivative of Equation 20 as shown in Equation S52, an increase in the ratio of **LH** and **2MP** to **4MP** and **DMB** arises when the product of  $\beta$  and  $\gamma$  is greater than the product of  $\alpha$  and  $\delta$  and a decrease in the ratio of **LH** and **2MP** to **4MP** and **DMB** arises when the product of  $\beta$  and  $\gamma$  is less than the product of  $\alpha$  and  $\delta$ .

$$\frac{d}{dP_{C_3H_6}} \left( \frac{(\alpha + \gamma P_{C_3H_6})}{(\beta + \delta P_{C_3H_6})} * \varepsilon \right) = \frac{(\beta * \gamma - \alpha * \delta)}{(\beta + \delta P_{C_3H_6})^2} * \varepsilon \quad (Eq. S52)$$

### S5. Supplemental DFT Calculations

The enthalpy and free energy diagrams for **4MP**, **DMB**, **LH**, and **2MP** for the Cossee-Arman mechanism (Scheme S1) are shown in Figures S8-S11, respectively. In all cases, the kinetically relevant step for each hexene product is the olefin insertion step with free energies ranging from 88 kJ mol<sup>-1</sup> to 143 kJ mol<sup>-1</sup>. The apparent activation energy for each hexene product is calculated from the difference in enthalpy between the nickel-propyl species and the kinetically relevant olefin insertion step. A comparison of apparent activation energies from experiment and computation are tabulated in Table S2. The differences in the calculated energy barriers and those from experiment are 5-27 kJ mol<sup>-1</sup> and are within the range of 8-23 kJ mol<sup>-1</sup>, consistent with differences in experimental and computed enthalpy barriers found in olefin oligomerization on Ni/Uio-66 and Ni/NU-1000 MOF materials using the M06L functional.<sup>1,6,9</sup> Electronic energy, enthalpy, and Gibbs free energy (hartree) for all intermediates and TS structures for species in Scheme S1 are reported in Table S3. The spin state in all species is in the singlet spin state (2S+1 = 0) based on previous calculations on Ni/Uio-66.<sup>1,6</sup>

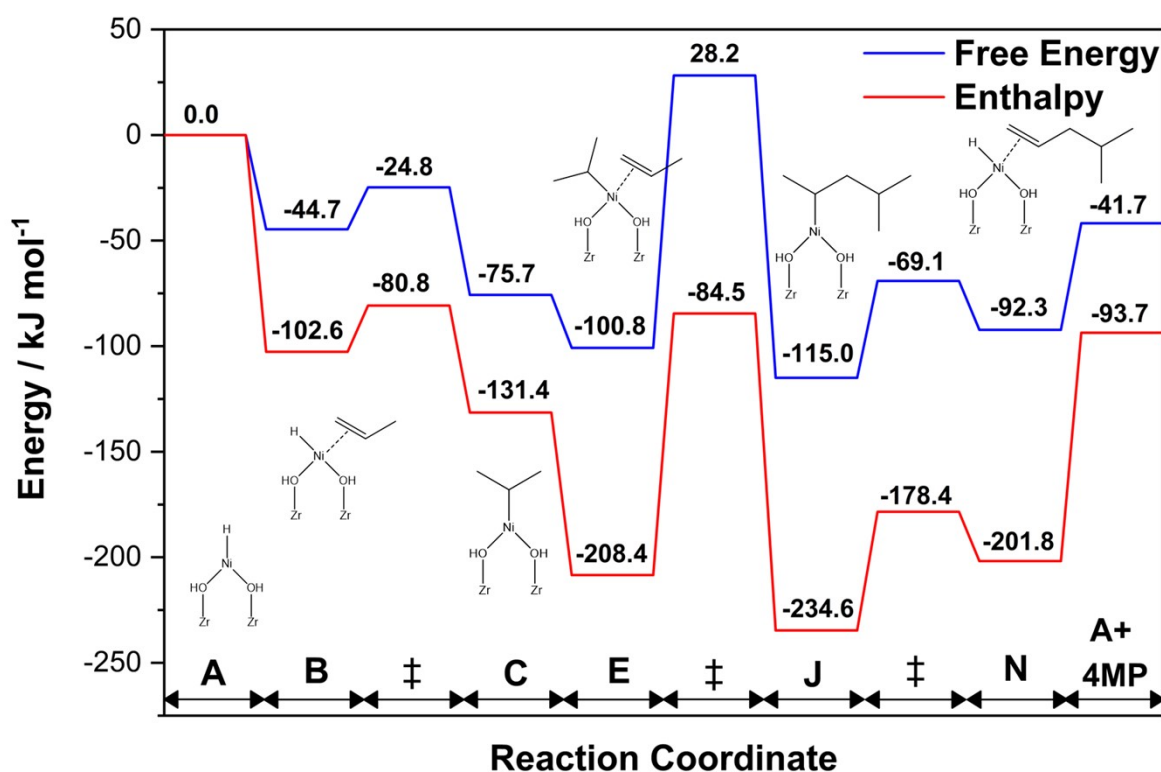

**Figure S8:** Free energy (blue) and enthalpy (red) diagram for **4MP** following the Cossee-Arman mechanism on cluster models during propylene oligomerization of Ni/Uio-66 at 101.3 kPa and 298 K.

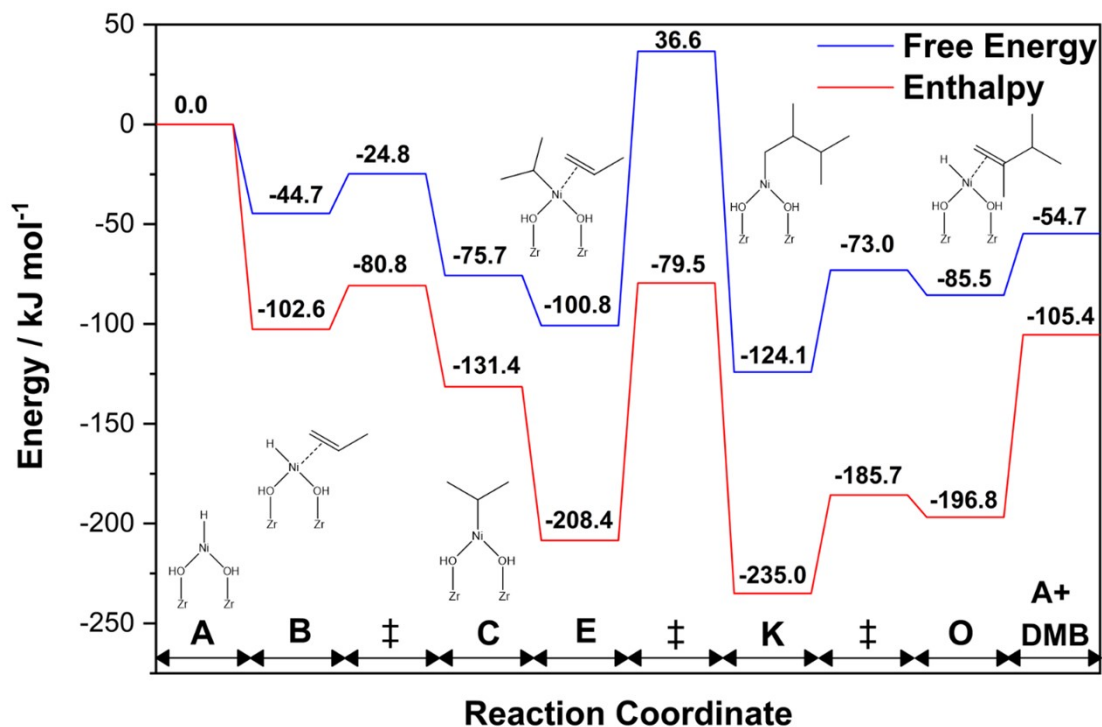

**Figure S9:** Free energy (blue) and enthalpy (red) diagram for **DMB** following the Cossee-Arlman mechanism on cluster models during propylene oligomerization of Ni/Uio-66 at 101.3 kPa and 298 K.

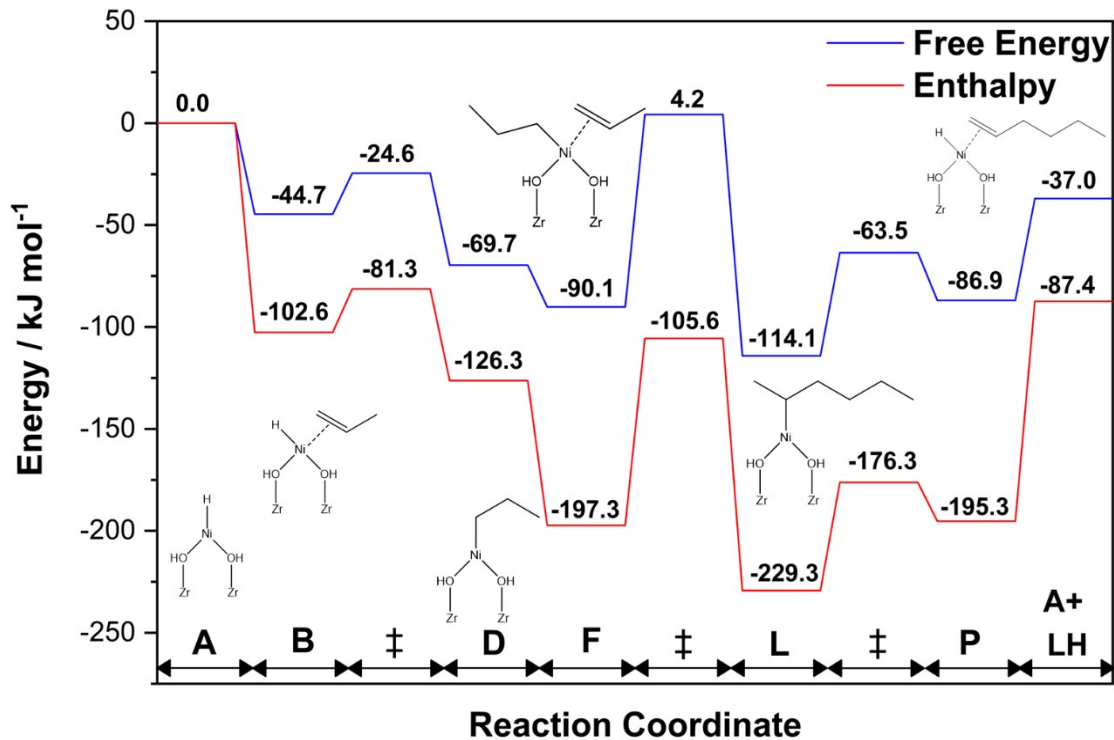

**Figure S10:** Free energy (blue) and enthalpy (red) diagram for **LH** following the Cossee-Arlman mechanism on cluster models during propylene oligomerization of Ni/Uio-66 at 101.3 kPa and 298 K.

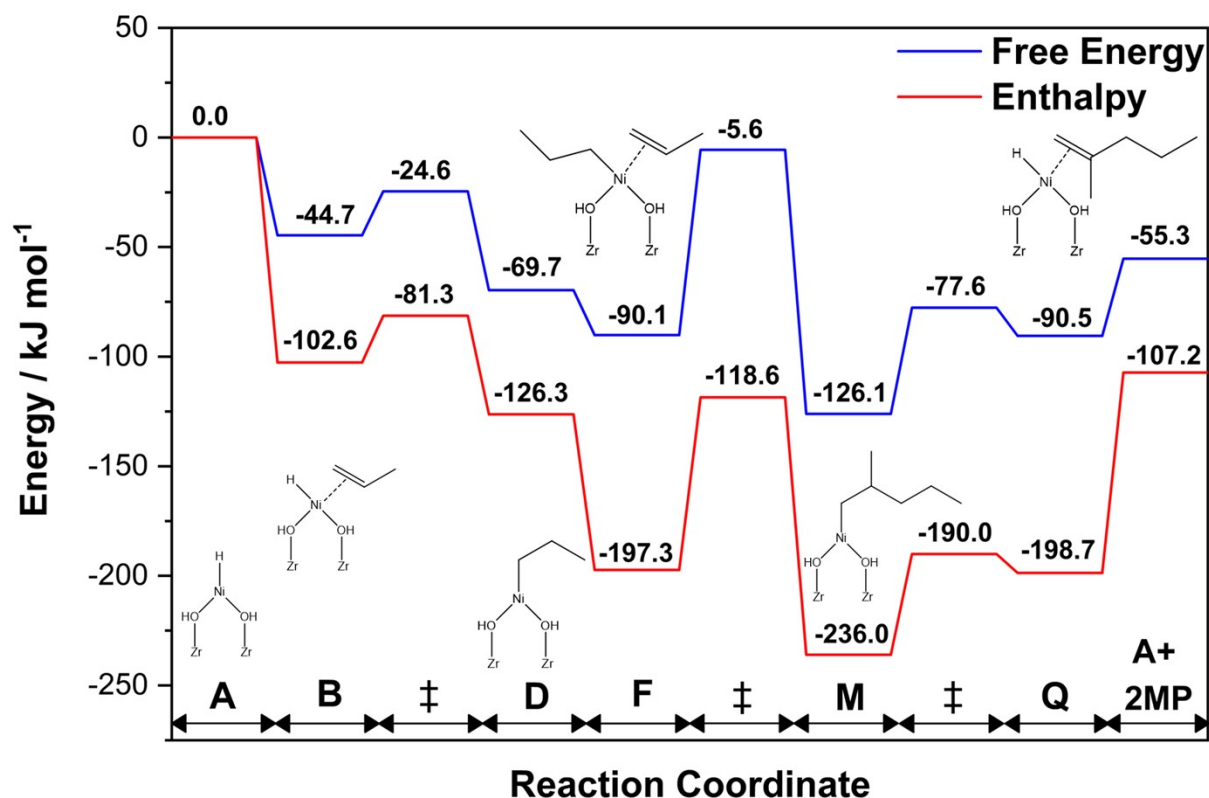

**Figure S11:** Free energy (blue) and enthalpy (red) diagram for **2MP** following the Cossee-Arlman mechanism on cluster models during propylene oligomerization of Ni/UiO-66 at 101.3 kPa and 298 K.

**Table S2:** Apparent activation energies from experiment and DFT for 4MP, DMB, LH, and 2MP on Ni/UiO-66 during propylene oligomerization at 259 kPa.

| Hexene Product | Experimental Activation Energy / $\text{kJ mol}^{-1}$ | Computed Activation Energy / $\text{kJ mol}^{-1}$ |
|----------------|-------------------------------------------------------|---------------------------------------------------|
| <b>4MP</b>     | $21.0 \pm 3.4$                                        | 46.9                                              |
| <b>DMB</b>     | $24.6 \pm 3.8$                                        | 51.9                                              |
| <b>LH</b>      | $15.7 \pm 2.2$                                        | 20.7                                              |
| <b>2MP</b>     | $17.5 \pm 2.8$                                        | 7.7                                               |

**Table S3:** Electronic energy, enthalpy, and Gibbs free energy (hartree) for all intermediates and transition state TS structures for the Cossee-Arlman mechanism in Scheme S1 at 298 K and 101.3 kPa. The relative enthalpies and free energies (kJ mol<sup>-1</sup>) with respect to **A** and two propylene molecules are reported.

| Structure                                   | E / hartree | H / hartree  | G / hartree  | $\Delta H$ / kJ mol <sup>-1</sup> | $\Delta G$ / kJ mol <sup>-1</sup> |
|---------------------------------------------|-------------|--------------|--------------|-----------------------------------|-----------------------------------|
| Propylene                                   | -117.71998  | -117.714938  | -117.744969  | -                                 | -                                 |
| 4MP                                         | -235.4743   | -235.465555  | -235.505839  | -                                 | -                                 |
| DMB                                         | -235.47893  | -235.470026  | -235.510782  | -                                 | -                                 |
| LH                                          | -235.472    | -235.463178  | -235.504029  | -                                 | -                                 |
| 2MP                                         | -235.47948  | -235.470712  | -235.51099   | -                                 | -                                 |
| <b>Production of 4-methylpentenes (4MP)</b> |             |              |              |                                   |                                   |
| A                                           | -4627.5525  | -4627.494089 | -4627.632369 | 0.0                               | 0.0                               |
| B                                           | -4745.3099  | -4745.248111 | -4745.394354 | -102.6                            | -44.7                             |
| B to C TS                                   | -4745.3025  | -4745.239784 | -4745.386784 | -80.8                             | -24.8                             |
| C                                           | -4745.3219  | -4745.259092 | -4745.406182 | -131.4                            | -75.7                             |
| E                                           | -4863.0708  | -4863.00334  | -4863.160706 | -208.4                            | -100.8                            |
| E to J TS                                   | -4863.0229  | -4862.956152 | -4863.111564 | -84.5                             | 28.2                              |
| J                                           | -4863.0777  | -4863.011623 | -4863.166105 | -203.7                            | -115.0                            |
| J to N TS                                   | -4863.0587  | -4862.991937 | -4863.148625 | -178.5                            | -69.1                             |
| N                                           | -4863.0677  | -4863.000829 | -4863.157453 | -201.83                           | -92.3                             |
| A + 4MP                                     | -4863.0268  | -4862.959644 | -4863.138208 | -93.7                             | -41.7                             |
| <b>Production of linear hexenes (LH)</b>    |             |              |              |                                   |                                   |
| A                                           | -4627.552   | -4627.4941   | -4627.632    | 0.0                               | 0                                 |
| B                                           | -4745.31    | -4745.2481   | -4745.394    | -102.6                            | -44.7                             |
| B to C TS                                   | -4745.302   | -4745.2398   | -4745.387    | -80.8                             | -24.8                             |
| C                                           | -4745.322   | -4745.2591   | -4745.406    | -131.4                            | -75.7                             |
| E                                           | -4863.071   | -4863.0033   | -4863.161    | -208.4                            | -100.8                            |
| E to K TS                                   | -4863.021   | -4862.9542   | -4863.108    | -79.5                             | 36.6                              |
| K                                           | -4863.08    | -4863.0135   | -4863.17     | -235.0                            | -124.1                            |
| K to O TS                                   | -4863.061   | -4862.9947   | -4863.15     | -185.7                            | -73.0                             |
| O                                           | -4863.066   | -4862.9989   | -4863.155    | -196.8                            | -85.5                             |
| A + DMB                                     | -4863.031   | -4862.9641   | -4863.143    | -105.4                            | -54.7                             |
| <b>Production of 2-methylpentenes (2MP)</b> |             |              |              |                                   |                                   |
| A                                           | -4627.5525  | -4627.494    | -4627.632369 | 0                                 | 0.0                               |
| B                                           | -4745.3099  | -4745.248    | -4745.394354 | -102.6                            | -44.7                             |
| B to D TS                                   | -4745.3026  | -4745.24     | -4745.3867   | -81.3                             | -24.6                             |
| D                                           | -4745.3198  | -4745.257    | -4745.403871 | -126.3                            | -69.7                             |
| F                                           | -4863.0665  | -4862.999    | -4863.156638 | -197.3                            | -90.1                             |
| F to L TS                                   | -4863.031   | -4862.964    | -4863.120695 | -105.6                            | 4.2                               |
| L                                           | -4863.0759  | -4863.009    | -4863.165782 | -223.4                            | -114.1                            |
| L to P TS                                   | -4863.0575  | -4862.991    | -4863.146506 | -176.3                            | -63.5                             |
| P                                           | -4863.0652  | -4862.998    | -4863.155421 | -195.3                            | -86.9                             |
| A + LH                                      | -4863.0245  | -4862.957    | -4863.136398 | -87.4                             | -37.0                             |
| <b>Production of 2-methylpentenes (2MP)</b> |             |              |              |                                   |                                   |
| A                                           | -4627.55    | -4627.4941   | -4627.63     | 0                                 | 0.0                               |
| B                                           | -4745.31    | -4745.2481   | -4745.39     | -102.6                            | -44.7                             |
| B to D TS                                   | -4745.3     | -4745.24     | -4745.39     | -81.3                             | -24.6                             |
| D                                           | -4745.32    | -4745.2571   | -4745.4      | -126.3                            | -69.7                             |
| F                                           | -4863.07    | -4862.9991   | -4863.16     | -197.3                            | -90.1                             |
| F to M TS                                   | -4863.04    | -4862.9691   | -4863.12     | -118.6                            | -5.6                              |

|           |          |            |          |        |        |
|-----------|----------|------------|----------|--------|--------|
| M         | -4863.08 | -4863.0139 | -4863.17 | -236.0 | -126.1 |
| M to Q TS | -4863.06 | -4862.9963 | -4863.15 | -190.0 | -77.6  |
| Q         | -4863.07 | -4862.9996 | -4863.16 | -198.7 | -90.5  |
| A + 2MP   | -4863.03 | -4862.9648 | -4863.14 | -107.2 | -55.3  |

---

## S6. Atomic Coordinates

### A

|   |           |            |            |
|---|-----------|------------|------------|
| C | -1.248539 | -33.130699 | -23.059703 |
| C | 3.414473  | -27.919858 | -17.352661 |
| C | 3.091481  | -32.678955 | -23.546704 |
| C | 3.883483  | -32.285010 | -17.224719 |
| C | -1.743494 | -28.525194 | -23.194700 |
| C | -1.165504 | -28.398058 | -16.837658 |
| C | 1.489575  | -34.960051 | -20.155870 |
| C | 5.485462  | -30.003967 | -20.616767 |
| C | 2.595477  | -28.072968 | -23.681697 |
| C | 0.524550  | -25.989960 | -20.416891 |
| C | -0.697582 | -32.762857 | -16.710698 |
| H | 1.545927  | -33.156253 | -18.161364 |
| H | 0.951871  | -27.622082 | -18.324780 |
| H | 3.588250  | -30.261189 | -22.464098 |
| O | 2.997591  | -27.742711 | -22.537749 |
| O | -0.935123 | -29.405332 | -23.612411 |
| O | -0.183737 | -29.124108 | -16.538688 |
| O | 2.145713  | -31.917767 | -23.881217 |
| O | 2.975585  | -31.545982 | -16.762759 |
| O | 5.044475  | -31.181173 | -20.553849 |
| O | -0.527229 | -26.648100 | -20.220190 |
| O | 2.534823  | -34.272086 | -20.284486 |
| O | -3.015238 | -29.276688 | -19.788256 |
| O | 4.041527  | -32.609992 | -18.431417 |
| O | -1.571144 | -28.105649 | -17.987965 |
| O | 3.545674  | -32.850076 | -22.387442 |
| O | -1.886014 | -28.152597 | -22.012997 |
| O | 1.833565  | -29.034825 | -23.964646 |
| O | 2.682571  | -28.808213 | -16.843533 |
| O | -0.639695 | -32.126821 | -23.532845 |
| O | 0.105516  | -31.828774 | -16.460343 |
| O | -2.671045 | -32.469108 | -19.690955 |
| O | 1.692621  | -26.446852 | -20.514276 |
| O | 0.320787  | -34.529933 | -19.991753 |
| O | 4.804273  | -28.945625 | -20.619207 |
| O | -1.022987 | -33.202559 | -17.839465 |
| O | 3.505759  | -27.637715 | -18.576923 |
| O | -1.320032 | -33.452773 | -21.856742 |
| O | 0.953706  | -28.419781 | -18.861636 |
| O | 2.860715  | -30.321892 | -21.838456 |
| O | 1.382993  | -32.409359 | -18.744567 |
| O | -1.386471 | -30.760785 | -21.275778 |
| O | 1.045924  | -31.956238 | -21.215613 |
| O | 2.586429  | -30.277287 | -19.337285 |
| O | -0.346865 | -30.583598 | -19.023740 |
| O | 0.735326  | -29.076229 | -21.300767 |

|    |           |            |            |
|----|-----------|------------|------------|
| Zr | -0.955854 | -28.837915 | -20.045433 |
| Zr | -0.564509 | -32.475293 | -19.938677 |
| Zr | 2.584572  | -28.519090 | -20.457745 |
| Zr | 0.765754  | -30.572962 | -22.714893 |
| Zr | 1.274988  | -30.370604 | -17.713509 |
| Zr | 2.965809  | -32.058324 | -20.353700 |
| H  | -1.768739 | -33.780795 | -23.794711 |
| H  | 1.614153  | -36.063145 | -20.183753 |
| H  | 3.576646  | -33.255316 | -24.362474 |
| H  | -1.161458 | -33.260558 | -15.831792 |
| H  | -1.728629 | -27.958462 | -15.986191 |
| H  | 0.412482  | -24.888941 | -20.507977 |
| H  | 2.951897  | -27.455499 | -24.533021 |
| H  | 4.036481  | -27.321574 | -16.654086 |
| H  | 6.587821  | -29.887466 | -20.682225 |
| H  | 4.613951  | -32.696352 | -16.496656 |
| H  | -2.385947 | -28.044943 | -23.962941 |
| H  | -3.484784 | -28.886585 | -19.044377 |
| H  | -3.049213 | -32.903365 | -18.919950 |
| Ni | -3.637623 | -30.981802 | -20.498400 |
| H  | -5.171412 | -31.143872 | -20.360411 |
| H  | -1.813659 | -30.829964 | -22.138087 |

## B

|   |           |            |            |
|---|-----------|------------|------------|
| C | -1.248611 | -33.130685 | -23.059805 |
| C | 3.414480  | -27.919953 | -17.352701 |
| C | 3.091479  | -32.678930 | -23.546596 |
| C | 3.883493  | -32.285001 | -17.224641 |
| C | -1.743627 | -28.525031 | -23.194664 |
| C | -1.165541 | -28.397672 | -16.837791 |
| C | 1.489630  | -34.960049 | -20.155927 |
| C | 5.485466  | -30.003978 | -20.616673 |
| C | 2.595492  | -28.073039 | -23.681651 |
| C | 0.524521  | -25.989952 | -20.417018 |
| C | -0.697400 | -32.763289 | -16.710600 |
| H | 1.530786  | -33.152607 | -18.160781 |
| H | 0.938108  | -27.627881 | -18.322926 |
| H | 3.562296  | -30.263819 | -22.476948 |
| O | 3.004258  | -27.739565 | -22.538406 |
| O | -0.911429 | -29.361119 | -23.645150 |
| O | -0.184112 | -29.117851 | -16.531883 |
| O | 2.140867  | -31.924044 | -23.874529 |
| O | 2.973151  | -31.548395 | -16.761461 |
| O | 5.045176  | -31.180903 | -20.553892 |
| O | -0.526551 | -26.647753 | -20.215306 |
| O | 2.537017  | -34.275499 | -20.279437 |
| O | -3.136103 | -29.052381 | -19.838501 |
| O | 4.041156  | -32.610558 | -18.430206 |
| O | -1.573526 | -28.106663 | -17.988979 |

|    |           |            |            |
|----|-----------|------------|------------|
| O  | 3.553077  | -32.851347 | -22.387782 |
| O  | -1.862932 | -28.158610 | -22.007450 |
| O  | 1.827380  | -29.029363 | -23.958287 |
| O  | 2.679482  | -28.806084 | -16.842206 |
| O  | -0.606320 | -32.167402 | -23.562946 |
| O  | 0.108436  | -31.836524 | -16.452094 |
| O  | -2.745115 | -32.687333 | -19.717043 |
| O  | 1.693864  | -26.442864 | -20.509451 |
| O  | 0.321490  | -34.528927 | -19.988013 |
| O  | 4.805047  | -28.945777 | -20.619873 |
| O  | -1.027770 | -33.198636 | -17.841324 |
| O  | 3.505715  | -27.637536 | -18.575825 |
| O  | -1.302458 | -33.438859 | -21.850719 |
| O  | 0.948047  | -28.424679 | -18.860964 |
| O  | 2.846863  | -30.323045 | -21.837341 |
| O  | 1.375860  | -32.404880 | -18.745053 |
| O  | -1.174722 | -30.739488 | -21.323494 |
| O  | 1.061601  | -31.972164 | -21.205714 |
| O  | 2.580178  | -30.277708 | -19.336159 |
| O  | -0.397519 | -30.586773 | -18.973036 |
| O  | 0.747262  | -29.055234 | -21.291319 |
| Zr | -0.944360 | -28.839001 | -20.065954 |
| Zr | -0.553217 | -32.470116 | -19.959943 |
| Zr | 2.588064  | -28.516204 | -20.465636 |
| Zr | 0.720070  | -30.576976 | -22.715317 |
| Zr | 1.276997  | -30.370007 | -17.717797 |
| Zr | 2.969978  | -32.060381 | -20.361616 |
| H  | -1.814958 | -33.769452 | -23.770166 |
| H  | 1.610889  | -36.063556 | -20.190121 |
| H  | 3.579732  | -33.250447 | -24.364336 |
| H  | -1.167663 | -33.261945 | -15.833795 |
| H  | -1.734798 | -27.959950 | -15.987457 |
| H  | 0.409490  | -24.889628 | -20.515576 |
| H  | 2.956194  | -27.460192 | -24.534903 |
| H  | 4.038847  | -27.324480 | -16.653466 |
| H  | 6.588125  | -29.887478 | -20.680608 |
| H  | 4.615670  | -32.693014 | -16.496100 |
| H  | -2.430722 | -28.066507 | -23.937111 |
| H  | -3.396914 | -28.578309 | -19.039095 |
| H  | -2.915769 | -33.161772 | -18.893260 |
| Ni | -3.420302 | -30.920913 | -19.654770 |
| H  | -2.048274 | -30.846434 | -21.735057 |
| C  | -3.596640 | -30.829587 | -17.482108 |
| H  | -3.389289 | -29.807154 | -17.156155 |
| H  | -2.925587 | -31.604642 | -17.109996 |
| C  | -4.790761 | -31.142212 | -18.087978 |
| H  | -5.048469 | -32.202210 | -18.215764 |
| C  | -5.902568 | -30.180153 | -18.332176 |
| H  | -6.732432 | -30.374016 | -17.633279 |
| H  | -5.589207 | -29.137457 | -18.192339 |
| H  | -6.318021 | -30.279538 | -19.345047 |

H -3.621307 -30.992718 -21.140981

**B to C TS**

|    |           |           |           |
|----|-----------|-----------|-----------|
| C  | 10.482563 | 13.517234 | 23.859346 |
| C  | 13.495905 | 16.642081 | 23.854624 |
| C  | 16.909376 | 13.434781 | 23.954829 |
| C  | 10.368201 | 16.571672 | 26.878761 |
| C  | 13.610906 | 16.682548 | 30.228008 |
| C  | 16.948977 | 10.422001 | 26.990989 |
| C  | 13.577425 | 10.302574 | 30.245528 |
| C  | 16.707673 | 16.768007 | 27.232027 |
| C  | 10.521521 | 10.244956 | 27.157966 |
| C  | 16.745475 | 13.719074 | 30.304600 |
| C  | 10.415721 | 13.285819 | 30.195707 |
| O  | 13.755097 | 11.720094 | 23.345250 |
| Zr | 13.691159 | 13.484258 | 24.533712 |
| O  | 10.072134 | 13.422403 | 25.044448 |
| O  | 11.670364 | 13.556797 | 23.466405 |
| O  | 15.733377 | 13.435403 | 23.508754 |
| O  | 13.609691 | 15.455394 | 23.454375 |
| Zr | 13.728817 | 10.971845 | 27.077899 |
| Zr | 11.119880 | 13.413287 | 27.025657 |
| O  | 15.045260 | 14.945148 | 25.660918 |
| O  | 12.309555 | 12.008235 | 25.611990 |
| O  | 12.574294 | 14.495532 | 26.007119 |
| O  | 14.739243 | 12.483705 | 26.057205 |
| O  | 13.494824 | 17.045656 | 25.044369 |
| O  | 17.271036 | 13.540599 | 25.151101 |
| Zr | 13.555033 | 16.003053 | 27.050742 |
| Zr | 16.156493 | 13.570541 | 27.115295 |
| H  | 11.774194 | 11.416400 | 25.068874 |
| H  | 15.595464 | 15.527097 | 25.129312 |
| H  | 11.572559 | 15.416407 | 29.004175 |
| O  | 12.151465 | 14.874986 | 28.460265 |
| O  | 15.507825 | 17.130836 | 27.141985 |
| O  | 11.545576 | 17.008421 | 26.947878 |
| O  | 13.564013 | 17.077687 | 29.035695 |
| Zr | 13.590592 | 13.495836 | 29.584853 |
| O  | 14.627693 | 14.570830 | 28.124913 |
| H  | 15.646457 | 11.589255 | 29.089276 |
| O  | 15.083435 | 12.122054 | 28.520852 |
| O  | 11.714806 | 9.869088  | 27.191298 |
| O  | 15.781931 | 9.962098  | 27.062289 |
| O  | 13.677535 | 9.902226  | 29.057183 |
| O  | 12.604983 | 12.425713 | 28.097991 |
| O  | 17.173517 | 13.678278 | 29.123784 |
| O  | 17.150375 | 15.592203 | 27.194947 |
| O  | 17.296385 | 11.628503 | 27.059528 |
| O  | 10.029110 | 13.327216 | 29.001468 |
| O  | 10.097595 | 11.427212 | 27.055038 |

|    |           |           |           |
|----|-----------|-----------|-----------|
| O  | 9.998171  | 15.372748 | 26.937218 |
| O  | 13.585818 | 15.493984 | 30.636370 |
| O  | 13.568133 | 11.493698 | 30.645205 |
| O  | 15.551451 | 13.623835 | 30.684772 |
| O  | 11.597539 | 13.375636 | 30.616388 |
| O  | 13.784179 | 9.765872  | 25.288319 |
| H  | 14.031809 | 8.851215  | 25.462924 |
| H  | 9.744094  | 9.451672  | 27.217164 |
| H  | 9.695778  | 13.565147 | 23.072734 |
| H  | 13.395762 | 17.420584 | 23.067926 |
| H  | 13.496707 | 9.516371  | 31.026586 |
| H  | 13.671550 | 17.471768 | 31.008094 |
| H  | 17.461350 | 17.576482 | 27.347511 |
| H  | 17.509203 | 13.840244 | 31.102802 |
| H  | 9.625945  | 13.164754 | 30.968075 |
| H  | 17.722173 | 13.343443 | 23.201217 |
| H  | 9.566494  | 17.332284 | 26.761595 |
| H  | 17.768793 | 9.680550  | 26.871847 |
| H  | 14.586069 | 11.661656 | 22.860605 |
| Ni | 12.888465 | 9.949658  | 23.580602 |
| C  | 12.198397 | 9.935206  | 21.705928 |
| H  | 12.676172 | 9.072804  | 21.217073 |
| C  | 11.201800 | 9.624736  | 22.651896 |
| H  | 10.512918 | 10.418449 | 22.980883 |
| H  | 10.750199 | 8.629764  | 22.696233 |
| C  | 12.273295 | 11.215755 | 20.946208 |
| H  | 13.303757 | 11.479368 | 20.673583 |
| H  | 11.716034 | 11.110180 | 20.000207 |
| H  | 11.853542 | 12.061243 | 21.503672 |
| H  | 12.260652 | 8.681698  | 23.806382 |

#### **B to D TS**

|    |           |           |           |
|----|-----------|-----------|-----------|
| C  | 10.482563 | 13.517234 | 23.859346 |
| C  | 13.495905 | 16.642081 | 23.854624 |
| C  | 16.909376 | 13.434781 | 23.954829 |
| C  | 10.368201 | 16.571672 | 26.878761 |
| C  | 13.610906 | 16.682548 | 30.228008 |
| C  | 16.948977 | 10.422001 | 26.990989 |
| C  | 13.577425 | 10.302574 | 30.245528 |
| C  | 16.707673 | 16.768007 | 27.232027 |
| C  | 10.521521 | 10.244956 | 27.157966 |
| C  | 16.745475 | 13.719074 | 30.304600 |
| C  | 10.415721 | 13.285819 | 30.195707 |
| O  | 13.734525 | 11.732604 | 23.320484 |
| Zr | 13.680871 | 13.485556 | 24.529053 |
| O  | 10.073365 | 13.419961 | 25.045663 |
| O  | 11.669649 | 13.546172 | 23.464462 |
| O  | 15.732802 | 13.423106 | 23.512445 |
| O  | 13.606314 | 15.455671 | 23.453770 |
| Zr | 13.722169 | 10.963792 | 27.079033 |

|    |           |           |           |
|----|-----------|-----------|-----------|
| Zr | 11.118653 | 13.414263 | 27.027174 |
| O  | 15.042610 | 14.945522 | 25.657624 |
| O  | 12.301544 | 12.001915 | 25.614381 |
| O  | 12.570109 | 14.498266 | 26.005824 |
| O  | 14.730614 | 12.487775 | 26.054094 |
| O  | 13.494717 | 17.046033 | 25.044421 |
| O  | 17.272567 | 13.537772 | 25.151459 |
| Zr | 13.553619 | 16.003412 | 27.049509 |
| Zr | 16.148943 | 13.571400 | 27.111551 |
| H  | 11.720902 | 11.442958 | 25.080257 |
| H  | 15.591834 | 15.530608 | 25.128444 |
| H  | 11.573258 | 15.418114 | 29.004951 |
| O  | 12.151078 | 14.875946 | 28.460689 |
| O  | 15.508124 | 17.131805 | 27.141220 |
| O  | 11.545483 | 17.008761 | 26.948992 |
| O  | 13.563993 | 17.078076 | 29.035788 |
| Zr | 13.589144 | 13.495338 | 29.583318 |
| O  | 14.626858 | 14.571970 | 28.124999 |
| H  | 15.645964 | 11.591855 | 29.088416 |
| O  | 15.080857 | 12.116989 | 28.514939 |
| O  | 11.715024 | 9.871452  | 27.195719 |
| O  | 15.781073 | 9.958122  | 27.036040 |
| O  | 13.682308 | 9.898604  | 29.059199 |
| O  | 12.603195 | 12.426387 | 28.098630 |
| O  | 17.171908 | 13.676710 | 29.123122 |
| O  | 17.148811 | 15.591584 | 27.192649 |
| O  | 17.293705 | 11.627022 | 27.065178 |
| O  | 10.028095 | 13.327416 | 29.002019 |
| O  | 10.095596 | 11.426473 | 27.053661 |
| O  | 9.997401  | 15.373314 | 26.938557 |
| O  | 13.586557 | 15.493812 | 30.636068 |
| O  | 13.566106 | 11.494490 | 30.642945 |
| O  | 15.551458 | 13.620073 | 30.684793 |
| O  | 11.597510 | 13.377256 | 30.616198 |
| O  | 13.803909 | 9.782178  | 25.293455 |
| H  | 14.391046 | 9.020796  | 25.331664 |
| H  | 9.745791  | 9.450287  | 27.217792 |
| H  | 9.695053  | 13.574951 | 23.075097 |
| H  | 13.399082 | 17.421363 | 23.068219 |
| H  | 13.496651 | 9.518469  | 31.028816 |
| H  | 13.671464 | 17.471573 | 31.008350 |
| H  | 17.462200 | 17.575502 | 27.348766 |
| H  | 17.508868 | 13.847329 | 31.101975 |
| H  | 9.626422  | 13.165096 | 30.968683 |
| H  | 17.721839 | 13.351430 | 23.199594 |
| H  | 9.566842  | 17.332647 | 26.761199 |
| H  | 17.771451 | 9.680912  | 26.884871 |
| H  | 14.638620 | 11.573478 | 23.025348 |
| Ni | 12.807635 | 10.011489 | 23.642943 |
| C  | 11.863335 | 8.998305  | 22.164474 |
| H  | 11.015270 | 8.372357  | 22.464911 |

|   |           |           |           |
|---|-----------|-----------|-----------|
| C | 11.658965 | 10.384244 | 22.100990 |
| H | 12.251060 | 11.017680 | 21.436020 |
| H | 10.708010 | 10.812162 | 22.435369 |
| C | 12.897751 | 8.283991  | 21.351250 |
| H | 13.321811 | 7.423107  | 21.885242 |
| H | 12.441718 | 7.890572  | 20.428605 |
| H | 13.722606 | 8.945799  | 21.054817 |
| H | 12.136466 | 8.771443  | 23.980416 |

## C

|    |           |           |           |
|----|-----------|-----------|-----------|
| C  | 10.482472 | 13.517337 | 23.859336 |
| C  | 13.496088 | 16.642020 | 23.854618 |
| C  | 16.909266 | 13.434581 | 23.954900 |
| C  | 10.368155 | 16.571681 | 26.878756 |
| C  | 13.610859 | 16.682526 | 30.228037 |
| C  | 16.949072 | 10.422173 | 26.990900 |
| C  | 13.577455 | 10.302597 | 30.245503 |
| C  | 16.707647 | 16.768005 | 27.232019 |
| C  | 10.521585 | 10.244977 | 27.157976 |
| C  | 16.745460 | 13.719069 | 30.304601 |
| C  | 10.415685 | 13.285780 | 30.195738 |
| O  | 13.739531 | 11.731568 | 23.299180 |
| Zr | 13.687148 | 13.484383 | 24.538138 |
| O  | 10.070749 | 13.406344 | 25.044386 |
| O  | 11.670109 | 13.581012 | 23.472732 |
| O  | 15.733058 | 13.436409 | 23.508541 |
| O  | 13.617343 | 15.456032 | 23.455712 |
| Zr | 13.719197 | 10.954485 | 27.081799 |
| Zr | 11.116424 | 13.410427 | 27.021204 |
| O  | 15.043291 | 14.945642 | 25.660962 |
| O  | 12.315601 | 11.994376 | 25.596423 |
| O  | 12.574732 | 14.494076 | 26.007647 |
| O  | 14.738368 | 12.481063 | 26.051911 |
| O  | 13.491018 | 17.046224 | 25.044600 |
| O  | 17.270512 | 13.534695 | 25.152106 |
| Zr | 13.553674 | 16.004986 | 27.050792 |
| Zr | 16.148737 | 13.569797 | 27.113606 |
| H  | 11.782792 | 11.420471 | 25.029142 |
| H  | 15.592112 | 15.526295 | 25.126505 |
| H  | 11.572306 | 15.417415 | 29.003760 |
| O  | 12.149951 | 14.876067 | 28.458464 |
| O  | 15.507844 | 17.131790 | 27.142208 |
| O  | 11.545271 | 17.009103 | 26.949525 |
| O  | 13.564044 | 17.078928 | 29.035826 |
| Zr | 13.585703 | 13.493888 | 29.579302 |
| O  | 14.626474 | 14.571018 | 28.124468 |
| H  | 15.643512 | 11.594343 | 29.093417 |
| O  | 15.078508 | 12.113719 | 28.514602 |
| O  | 11.712492 | 9.867242  | 27.190247 |

|    |           |           |           |
|----|-----------|-----------|-----------|
| O  | 15.782699 | 9.956560  | 27.027530 |
| O  | 13.679285 | 9.893942  | 29.061136 |
| O  | 12.597366 | 12.426477 | 28.092765 |
| O  | 17.172845 | 13.674937 | 29.123295 |
| O  | 17.148877 | 15.591716 | 27.193449 |
| O  | 17.293923 | 11.626127 | 27.072187 |
| O  | 10.027999 | 13.327302 | 29.001849 |
| O  | 10.097117 | 11.426580 | 27.051574 |
| O  | 9.998601  | 15.372496 | 26.932238 |
| O  | 13.585851 | 15.493515 | 30.634757 |
| O  | 13.563892 | 11.495740 | 30.639462 |
| O  | 15.551058 | 13.619585 | 30.683215 |
| O  | 11.597538 | 13.377587 | 30.616020 |
| O  | 13.783122 | 9.702533  | 25.368641 |
| H  | 14.617134 | 9.219357  | 25.345845 |
| H  | 9.742856  | 9.453088  | 27.224436 |
| H  | 9.696945  | 13.559748 | 23.072136 |
| H  | 13.393655 | 17.419936 | 23.067642 |
| H  | 13.501333 | 9.521441  | 31.032331 |
| H  | 13.672063 | 17.471119 | 31.008728 |
| H  | 17.462018 | 17.575896 | 27.347117 |
| H  | 17.508142 | 13.849146 | 31.102331 |
| H  | 9.626504  | 13.164911 | 30.968803 |
| H  | 17.722319 | 13.342326 | 23.201522 |
| H  | 9.566063  | 17.332583 | 26.766140 |
| H  | 17.772852 | 9.682190  | 26.884289 |
| H  | 14.500887 | 11.719978 | 22.707726 |
| Ni | 13.011665 | 9.992666  | 23.563930 |
| C  | 12.045884 | 9.789141  | 21.963856 |
| H  | 12.734290 | 9.697278  | 21.109464 |
| C  | 10.921880 | 10.751673 | 21.725127 |
| H  | 11.304313 | 11.759170 | 21.511786 |
| H  | 10.293023 | 10.452266 | 20.868091 |
| H  | 10.251952 | 10.827616 | 22.596392 |
| C  | 11.798000 | 8.528493  | 22.699806 |
| H  | 10.753132 | 8.357331  | 22.999342 |
| H  | 12.211006 | 7.616249  | 22.246938 |
| H  | 12.325223 | 8.503290  | 23.749694 |

## D

|   |           |           |           |
|---|-----------|-----------|-----------|
| C | 10.482685 | 13.517077 | 23.859501 |
| C | 13.495993 | 16.641965 | 23.854693 |
| C | 16.909489 | 13.434778 | 23.954791 |
| C | 10.368266 | 16.571600 | 26.878820 |
| C | 13.610909 | 16.682540 | 30.228067 |
| C | 16.948748 | 10.422218 | 26.990830 |
| C | 13.577337 | 10.302725 | 30.245392 |
| C | 16.707759 | 16.768009 | 27.232025 |
| C | 10.521477 | 10.244906 | 27.157980 |
| C | 16.745407 | 13.719135 | 30.304545 |

|    |           |           |           |
|----|-----------|-----------|-----------|
| C  | 10.415671 | 13.285793 | 30.195741 |
| O  | 13.741075 | 11.747680 | 23.302062 |
| Zr | 13.687029 | 13.483071 | 24.528691 |
| O  | 10.073613 | 13.412773 | 25.046150 |
| O  | 11.668444 | 13.544856 | 23.463902 |
| O  | 15.734936 | 13.438873 | 23.507749 |
| O  | 13.606017 | 15.455085 | 23.455215 |
| Zr | 13.722203 | 10.961278 | 27.085355 |
| Zr | 11.120374 | 13.414391 | 27.024843 |
| O  | 15.043356 | 14.944931 | 25.658837 |
| O  | 12.310782 | 12.002959 | 25.615636 |
| O  | 12.570584 | 14.498399 | 26.005398 |
| O  | 14.735538 | 12.483116 | 26.053607 |
| O  | 13.495426 | 17.046737 | 25.044334 |
| O  | 17.270185 | 13.530988 | 25.152955 |
| Zr | 13.553615 | 16.003247 | 27.048689 |
| Zr | 16.148992 | 13.570849 | 27.112385 |
| H  | 11.747294 | 11.434397 | 25.072140 |
| H  | 15.593469 | 15.528150 | 25.128490 |
| H  | 11.573083 | 15.418521 | 29.004415 |
| O  | 12.150965 | 14.876008 | 28.460516 |
| O  | 15.508124 | 17.131528 | 27.141777 |
| O  | 11.545423 | 17.008955 | 26.949104 |
| O  | 13.563990 | 17.077779 | 29.035838 |
| Zr | 13.588195 | 13.496087 | 29.583832 |
| O  | 14.626493 | 14.570652 | 28.125001 |
| H  | 15.645959 | 11.592967 | 29.092415 |
| O  | 15.080732 | 12.114436 | 28.515692 |
| O  | 11.714278 | 9.871773  | 27.198571 |
| O  | 15.779234 | 9.960222  | 27.018421 |
| O  | 13.684631 | 9.896246  | 29.060386 |
| O  | 12.601991 | 12.425376 | 28.099944 |
| O  | 17.171913 | 13.676510 | 29.123200 |
| O  | 17.148982 | 15.591519 | 27.192437 |
| O  | 17.295246 | 11.625219 | 27.075012 |
| O  | 10.029241 | 13.323994 | 29.001408 |
| O  | 10.093639 | 11.424653 | 27.043199 |
| O  | 9.997829  | 15.372966 | 26.937124 |
| O  | 13.586740 | 15.493737 | 30.636265 |
| O  | 13.564537 | 11.495020 | 30.641331 |
| O  | 15.551302 | 13.619143 | 30.684474 |
| O  | 11.597068 | 13.379221 | 30.617016 |
| O  | 13.781140 | 9.727947  | 25.333658 |
| H  | 14.538982 | 9.135533  | 25.282868 |
| H  | 9.745621  | 9.449449  | 27.221396 |
| H  | 9.693379  | 13.584147 | 23.077695 |
| H  | 13.398769 | 17.420582 | 23.067712 |
| H  | 13.495817 | 9.519830  | 31.029832 |
| H  | 13.671415 | 17.471586 | 31.008365 |
| H  | 17.462246 | 17.575559 | 27.348465 |
| H  | 17.508489 | 13.848478 | 31.101995 |

|    |           |           |           |
|----|-----------|-----------|-----------|
| H  | 9.625805  | 13.166273 | 30.968302 |
| H  | 17.723723 | 13.343934 | 23.202415 |
| H  | 9.566642  | 17.332470 | 26.762441 |
| H  | 17.770304 | 9.679376  | 26.889596 |
| H  | 14.588404 | 11.671114 | 22.849506 |
| Ni | 12.871710 | 10.011039 | 23.694338 |
| C  | 9.886684  | 10.075878 | 22.785575 |
| H  | 9.838089  | 10.555230 | 23.775734 |
| H  | 9.695105  | 10.850270 | 22.031111 |
| H  | 9.062096  | 9.351987  | 22.738804 |
| C  | 11.726638 | 8.531409  | 23.669907 |
| H  | 11.102367 | 8.436735  | 24.567848 |
| H  | 12.227395 | 7.591005  | 23.405220 |
| C  | 11.213287 | 9.372113  | 22.568630 |
| H  | 11.261344 | 8.882377  | 21.580789 |
| H  | 11.996469 | 10.231249 | 22.323676 |

## E

|    |           |           |           |
|----|-----------|-----------|-----------|
| C  | 10.482568 | 13.517215 | 23.859364 |
| C  | 13.495868 | 16.642084 | 23.854622 |
| C  | 16.909384 | 13.434807 | 23.954813 |
| C  | 10.368212 | 16.571668 | 26.878765 |
| C  | 13.610918 | 16.682546 | 30.228008 |
| C  | 16.948976 | 10.421983 | 26.991016 |
| C  | 13.577380 | 10.302576 | 30.245531 |
| C  | 16.707682 | 16.768011 | 27.232019 |
| C  | 10.521539 | 10.244966 | 27.157942 |
| C  | 16.745484 | 13.719071 | 30.304603 |
| C  | 10.415731 | 13.285819 | 30.195703 |
| O  | 13.757073 | 11.729638 | 23.355223 |
| Zr | 13.684237 | 13.480988 | 24.536428 |
| O  | 10.075034 | 13.422542 | 25.045960 |
| O  | 11.669211 | 13.552111 | 23.463077 |
| O  | 15.735009 | 13.440652 | 23.506733 |
| O  | 13.606872 | 15.455744 | 23.454093 |
| Zr | 13.722770 | 10.967581 | 27.074646 |
| Zr | 11.114775 | 13.409687 | 27.023580 |
| O  | 15.042417 | 14.945599 | 25.661468 |
| O  | 12.309742 | 11.987865 | 25.603501 |
| O  | 12.568672 | 14.491766 | 26.009939 |
| O  | 14.739077 | 12.485617 | 26.058500 |
| O  | 13.493297 | 17.045107 | 25.045168 |
| O  | 17.269979 | 13.533604 | 25.152414 |
| Zr | 13.552263 | 16.001732 | 27.049912 |
| Zr | 16.151534 | 13.572509 | 27.115236 |
| H  | 11.794773 | 11.406092 | 25.030526 |
| H  | 15.589642 | 15.529764 | 25.129253 |
| H  | 11.573089 | 15.417700 | 29.005719 |
| O  | 12.149344 | 14.874499 | 28.460792 |
| O  | 15.507834 | 17.130733 | 27.143128 |

|    |           |           |           |
|----|-----------|-----------|-----------|
| O  | 11.545630 | 17.008258 | 26.948415 |
| O  | 13.562906 | 17.077785 | 29.035708 |
| Zr | 13.587906 | 13.495233 | 29.582352 |
| O  | 14.627217 | 14.571808 | 28.126435 |
| H  | 15.642060 | 11.590169 | 29.092082 |
| O  | 15.080604 | 12.116947 | 28.516563 |
| O  | 11.716957 | 9.882450  | 27.222748 |
| O  | 15.779954 | 9.958857  | 27.029207 |
| O  | 13.688712 | 9.898230  | 29.059929 |
| O  | 12.604018 | 12.428367 | 28.091713 |
| O  | 17.173434 | 13.677029 | 29.123697 |
| O  | 17.150266 | 15.591983 | 27.193026 |
| O  | 17.295072 | 11.625613 | 27.071438 |
| O  | 10.028670 | 13.322101 | 29.001334 |
| O  | 10.089574 | 11.423078 | 27.045225 |
| O  | 9.997222  | 15.373124 | 26.938437 |
| O  | 13.586289 | 15.493761 | 30.636117 |
| O  | 13.561752 | 11.495109 | 30.641792 |
| O  | 15.551268 | 13.620472 | 30.683847 |
| O  | 11.597341 | 13.377538 | 30.615999 |
| O  | 13.781098 | 9.734106  | 25.306548 |
| H  | 14.407071 | 9.007985  | 25.408739 |
| H  | 9.751136  | 9.443591  | 27.202970 |
| H  | 9.693293  | 13.566949 | 23.076249 |
| H  | 13.399598 | 17.422227 | 23.068983 |
| H  | 13.495161 | 9.519184  | 31.029362 |
| H  | 13.672652 | 17.471650 | 31.008151 |
| H  | 17.461737 | 17.576286 | 27.346697 |
| H  | 17.508258 | 13.846749 | 31.102682 |
| H  | 9.625809  | 13.169523 | 30.968663 |
| H  | 17.723904 | 13.340369 | 23.202965 |
| H  | 9.566918  | 17.332766 | 26.761821 |
| H  | 17.770500 | 9.679827  | 26.885049 |
| H  | 14.621009 | 11.693706 | 22.928485 |
| Ni | 13.044393 | 9.823082  | 23.505778 |
| C  | 12.745758 | 9.776651  | 21.481907 |
| H  | 12.807025 | 8.713970  | 21.215792 |
| C  | 11.619715 | 10.206241 | 22.186688 |
| H  | 11.404089 | 11.279381 | 22.237883 |
| H  | 10.786041 | 9.527990  | 22.391190 |
| C  | 13.623796 | 10.667148 | 20.666713 |
| H  | 14.692934 | 10.442282 | 20.801725 |
| H  | 13.416749 | 10.497766 | 19.597664 |
| H  | 13.457161 | 11.729263 | 20.878549 |
| C  | 12.498360 | 7.945218  | 23.632238 |
| H  | 11.950478 | 7.730375  | 22.699381 |
| C  | 11.583673 | 7.699458  | 24.804284 |
| H  | 10.685876 | 8.335625  | 24.769626 |
| H  | 11.225774 | 6.653657  | 24.804786 |
| H  | 12.072751 | 7.881700  | 25.769631 |
| C  | 13.765868 | 7.121566  | 23.649342 |

|   |           |          |           |
|---|-----------|----------|-----------|
| H | 14.447884 | 7.364510 | 22.819411 |
| H | 14.332998 | 7.223076 | 24.588159 |
| H | 13.538199 | 6.043912 | 23.559536 |

# F

|    |           |           |           |
|----|-----------|-----------|-----------|
| C  | 10.482561 | 13.517237 | 23.859347 |
| C  | 13.495913 | 16.642078 | 23.854626 |
| C  | 16.909374 | 13.434773 | 23.954836 |
| C  | 10.368199 | 16.571673 | 26.878761 |
| C  | 13.610903 | 16.682548 | 30.228008 |
| C  | 16.948976 | 10.422007 | 26.990982 |
| C  | 13.577433 | 10.302576 | 30.245524 |
| C  | 16.707671 | 16.768006 | 27.232027 |
| C  | 10.521521 | 10.244956 | 27.157967 |
| C  | 16.745473 | 13.719075 | 30.304599 |
| C  | 10.415719 | 13.285819 | 30.195707 |
| O  | 13.739646 | 11.728690 | 23.332072 |
| Zr | 13.683891 | 13.480699 | 24.530525 |
| O  | 10.074027 | 13.419006 | 25.045098 |
| O  | 11.669946 | 13.559016 | 23.465109 |
| O  | 15.733838 | 13.429466 | 23.509558 |
| O  | 13.608960 | 15.455985 | 23.453678 |
| Zr | 13.724119 | 10.968462 | 27.077614 |
| Zr | 11.118283 | 13.413714 | 27.025766 |
| O  | 15.043171 | 14.944814 | 25.659251 |
| O  | 12.304418 | 11.997065 | 25.607489 |
| O  | 12.570587 | 14.494842 | 26.007710 |
| O  | 14.734729 | 12.486993 | 26.056371 |
| O  | 13.493663 | 17.045407 | 25.044899 |
| O  | 17.271164 | 13.536633 | 25.151745 |
| Zr | 13.553537 | 16.002246 | 27.049121 |
| Zr | 16.151240 | 13.572276 | 27.113479 |
| H  | 11.751511 | 11.430712 | 25.054409 |
| H  | 15.591218 | 15.529900 | 25.128835 |
| H  | 11.573410 | 15.418183 | 29.004994 |
| O  | 12.150687 | 14.875240 | 28.460899 |
| O  | 15.507992 | 17.131060 | 27.141727 |
| O  | 11.545408 | 17.008465 | 26.949300 |
| O  | 13.563782 | 17.077704 | 29.035751 |
| Zr | 13.589097 | 13.495725 | 29.583897 |
| O  | 14.627115 | 14.571553 | 28.125770 |
| H  | 15.644618 | 11.590667 | 29.089486 |
| O  | 15.080953 | 12.118202 | 28.516799 |
| O  | 11.715905 | 9.872272  | 27.195973 |
| O  | 15.781050 | 9.958566  | 27.041691 |
| O  | 13.681676 | 9.899791  | 29.058624 |
| O  | 12.603707 | 12.426841 | 28.095401 |
| O  | 17.172668 | 13.676975 | 29.123435 |
| O  | 17.149713 | 15.591821 | 27.193274 |
| O  | 17.294211 | 11.626957 | 27.065475 |

|    |           |           |           |
|----|-----------|-----------|-----------|
| O  | 10.028549 | 13.326505 | 29.001721 |
| O  | 10.094692 | 11.425579 | 27.054975 |
| O  | 9.997603  | 15.372934 | 26.937369 |
| O  | 13.586222 | 15.493735 | 30.636275 |
| O  | 13.565508 | 11.494548 | 30.643160 |
| O  | 15.551320 | 13.621225 | 30.684488 |
| O  | 11.597638 | 13.376279 | 30.615987 |
| O  | 13.807685 | 9.777301  | 25.290076 |
| H  | 14.349781 | 8.986723  | 25.385859 |
| H  | 9.746653  | 9.448500  | 27.214229 |
| H  | 9.694715  | 13.563566 | 23.074599 |
| H  | 13.397793 | 17.421829 | 23.068829 |
| H  | 13.497684 | 9.518038  | 31.028387 |
| H  | 13.671970 | 17.471577 | 31.008268 |
| H  | 17.461836 | 17.575986 | 27.347686 |
| H  | 17.508671 | 13.846115 | 31.102338 |
| H  | 9.626130  | 13.166925 | 30.968594 |
| H  | 17.722899 | 13.347392 | 23.201187 |
| H  | 9.566652  | 17.332507 | 26.761971 |
| H  | 17.770609 | 9.680817  | 26.880192 |
| H  | 14.634055 | 11.625913 | 22.987124 |
| Ni | 12.891585 | 9.892421  | 23.580399 |
| C  | 12.583251 | 9.698602  | 21.580296 |
| H  | 12.478089 | 8.621981  | 21.411202 |
| C  | 11.534982 | 10.368191 | 22.211436 |
| H  | 11.496845 | 11.461631 | 22.167142 |
| H  | 10.603535 | 9.852436  | 22.461504 |
| C  | 13.620742 | 10.362695 | 20.737040 |
| H  | 14.632869 | 9.982379  | 20.942387 |
| H  | 13.425410 | 10.134831 | 19.676678 |
| H  | 13.622081 | 11.451837 | 20.855114 |
| C  | 12.026728 | 8.219630  | 24.046453 |
| H  | 11.299057 | 8.614039  | 24.780838 |
| H  | 12.790137 | 7.685311  | 24.636167 |
| C  | 11.364068 | 7.269496  | 23.076416 |
| H  | 10.657183 | 7.793602  | 22.410158 |
| H  | 12.117088 | 6.818046  | 22.407436 |
| C  | 10.619070 | 6.154823  | 23.796128 |
| H  | 9.821052  | 6.555535  | 24.438503 |
| H  | 10.153732 | 5.451313  | 23.091135 |
| H  | 11.291944 | 5.575363  | 24.445145 |

#### **E to J TS**

|   |           |           |           |
|---|-----------|-----------|-----------|
| C | 10.482595 | 13.517215 | 23.859340 |
| C | 13.495822 | 16.642122 | 23.854605 |
| C | 16.909395 | 13.434876 | 23.954722 |
| C | 10.368238 | 16.571654 | 26.878775 |
| C | 13.610928 | 16.682528 | 30.228006 |
| C | 16.948960 | 10.421935 | 26.991080 |
| C | 13.577332 | 10.302576 | 30.245571 |

|    |           |           |           |
|----|-----------|-----------|-----------|
| C  | 16.707694 | 16.768000 | 27.232026 |
| C  | 10.521552 | 10.244949 | 27.157961 |
| C  | 16.745478 | 13.719077 | 30.304602 |
| C  | 10.415747 | 13.285814 | 30.195698 |
| O  | 13.808970 | 11.750954 | 23.299605 |
| Zr | 13.689406 | 13.486479 | 24.540386 |
| O  | 10.073418 | 13.415104 | 25.046617 |
| O  | 11.669852 | 13.563805 | 23.469298 |
| O  | 15.738724 | 13.483399 | 23.501195 |
| O  | 13.609384 | 15.455276 | 23.456976 |
| Zr | 13.719243 | 10.954344 | 27.072285 |
| Zr | 11.116578 | 13.410065 | 27.017773 |
| O  | 15.042033 | 14.948673 | 25.664803 |
| O  | 12.324556 | 11.984866 | 25.585258 |
| O  | 12.572385 | 14.493745 | 26.008369 |
| O  | 14.742303 | 12.481888 | 26.050822 |
| O  | 13.492879 | 17.047254 | 25.044449 |
| O  | 17.267839 | 13.520255 | 25.154986 |
| Zr | 13.553480 | 16.005399 | 27.051538 |
| Zr | 16.149822 | 13.570195 | 27.114423 |
| H  | 11.815935 | 11.408773 | 25.002649 |
| H  | 15.590327 | 15.525068 | 25.125252 |
| H  | 11.572347 | 15.416450 | 29.004545 |
| O  | 12.149354 | 14.875281 | 28.458400 |
| O  | 15.507972 | 17.132282 | 27.145611 |
| O  | 11.545524 | 17.008986 | 26.947754 |
| O  | 13.562564 | 17.079716 | 29.036029 |
| Zr | 13.585624 | 13.492310 | 29.576770 |
| O  | 14.626511 | 14.571376 | 28.124666 |
| H  | 15.642204 | 11.594596 | 29.093657 |
| O  | 15.079108 | 12.113549 | 28.512699 |
| O  | 11.711956 | 9.870706  | 27.231345 |
| O  | 15.780405 | 9.957796  | 27.007555 |
| O  | 13.690060 | 9.893459  | 29.062434 |
| O  | 12.599454 | 12.427591 | 28.085203 |
| O  | 17.173939 | 13.676563 | 29.123760 |
| O  | 17.149266 | 15.591783 | 27.192374 |
| O  | 17.295466 | 11.623682 | 27.083077 |
| O  | 10.028980 | 13.319948 | 29.000806 |
| O  | 10.097197 | 11.423737 | 27.032921 |
| O  | 9.997855  | 15.373010 | 26.936584 |
| O  | 13.586767 | 15.493298 | 30.633980 |
| O  | 13.558709 | 11.496459 | 30.638272 |
| O  | 15.550898 | 13.617882 | 30.682340 |
| O  | 11.597255 | 13.379384 | 30.615786 |
| O  | 13.734284 | 9.689419  | 25.360240 |
| H  | 14.565842 | 9.199819  | 25.373198 |
| H  | 9.743195  | 9.450548  | 27.203653 |
| H  | 9.695238  | 13.565348 | 23.075063 |
| H  | 13.397543 | 17.420061 | 23.067136 |
| H  | 13.496725 | 9.522418  | 31.033021 |

|    |           |           |           |
|----|-----------|-----------|-----------|
| H  | 13.672569 | 17.470788 | 31.009058 |
| H  | 17.462545 | 17.575812 | 27.345185 |
| H  | 17.507346 | 13.849390 | 31.103138 |
| H  | 9.625796  | 13.169761 | 30.968734 |
| H  | 17.724502 | 13.316705 | 23.206937 |
| H  | 9.566494  | 17.332678 | 26.764057 |
| H  | 17.771949 | 9.679861  | 26.892206 |
| H  | 14.469260 | 11.872477 | 22.608079 |
| Ni | 13.288014 | 9.924884  | 23.373099 |
| C  | 13.568996 | 8.256671  | 22.182304 |
| H  | 13.205466 | 7.390484  | 21.613880 |
| C  | 13.414007 | 9.560745  | 21.524598 |
| H  | 14.311058 | 10.026371 | 21.094587 |
| H  | 12.524370 | 9.694646  | 20.894144 |
| C  | 14.947234 | 7.915367  | 22.722911 |
| H  | 14.901401 | 7.206609  | 23.560923 |
| H  | 15.551054 | 7.435988  | 21.936115 |
| H  | 15.503205 | 8.801430  | 23.065102 |
| C  | 12.073596 | 8.058266  | 23.284474 |
| H  | 11.494481 | 7.709815  | 22.420180 |
| C  | 11.127577 | 9.071000  | 23.947383 |
| H  | 10.933971 | 9.970776  | 23.338262 |
| H  | 10.148000 | 8.574290  | 24.062628 |
| H  | 11.455637 | 9.352113  | 24.954205 |
| C  | 12.374355 | 6.906703  | 24.210186 |
| H  | 12.907820 | 6.086851  | 23.708827 |
| H  | 12.966763 | 7.235908  | 25.076058 |
| H  | 11.438305 | 6.487450  | 24.609674 |

#### **E to K TS**

|    |           |           |           |
|----|-----------|-----------|-----------|
| C  | 10.482568 | 13.517215 | 23.859364 |
| C  | 13.495868 | 16.642084 | 23.854622 |
| C  | 16.909384 | 13.434807 | 23.954813 |
| C  | 10.368212 | 16.571668 | 26.878765 |
| C  | 13.610918 | 16.682546 | 30.228008 |
| C  | 16.948976 | 10.421983 | 26.991016 |
| C  | 13.577380 | 10.302576 | 30.245531 |
| C  | 16.707682 | 16.768011 | 27.232019 |
| C  | 10.521539 | 10.244966 | 27.157942 |
| C  | 16.745484 | 13.719071 | 30.304603 |
| C  | 10.415731 | 13.285819 | 30.195703 |
| O  | 13.696639 | 11.713565 | 23.306936 |
| Zr | 13.686589 | 13.474603 | 24.536047 |
| O  | 10.068582 | 13.391698 | 25.043007 |
| O  | 11.669237 | 13.614634 | 23.479900 |
| O  | 15.732672 | 13.430206 | 23.508983 |
| O  | 13.625327 | 15.457071 | 23.455991 |
| Zr | 13.718518 | 10.961904 | 27.082819 |
| Zr | 11.113778 | 13.408518 | 27.017257 |
| O  | 15.043367 | 14.944884 | 25.661602 |

|    |           |           |           |
|----|-----------|-----------|-----------|
| O  | 12.321260 | 11.985228 | 25.589189 |
| O  | 12.577078 | 14.486679 | 26.009451 |
| O  | 14.742626 | 12.481892 | 26.052897 |
| O  | 13.486443 | 17.045756 | 25.045193 |
| O  | 17.271567 | 13.538167 | 25.151564 |
| Zr | 13.553007 | 16.002296 | 27.048629 |
| Zr | 16.149277 | 13.572182 | 27.113290 |
| H  | 11.833535 | 11.392363 | 25.001924 |
| H  | 15.590056 | 15.526134 | 25.125695 |
| H  | 11.572186 | 15.419003 | 29.002686 |
| O  | 12.148559 | 14.876534 | 28.457172 |
| O  | 15.507885 | 17.131155 | 27.141577 |
| O  | 11.545156 | 17.008691 | 26.949851 |
| O  | 13.564427 | 17.078478 | 29.035842 |
| Zr | 13.584675 | 13.495625 | 29.578962 |
| O  | 14.626655 | 14.571904 | 28.125469 |
| H  | 15.640412 | 11.594366 | 29.094180 |
| O  | 15.077206 | 12.116964 | 28.516647 |
| O  | 11.711634 | 9.863038  | 27.181280 |
| O  | 15.786562 | 9.950629  | 27.054660 |
| O  | 13.674631 | 9.893746  | 29.060955 |
| O  | 12.593547 | 12.428352 | 28.091870 |
| O  | 17.173519 | 13.674218 | 29.123558 |
| O  | 17.150077 | 15.592125 | 27.194636 |
| O  | 17.291877 | 11.626564 | 27.066424 |
| O  | 10.027133 | 13.329692 | 29.002261 |
| O  | 10.098264 | 11.426951 | 27.057743 |
| O  | 9.998510  | 15.372033 | 26.926491 |
| O  | 13.584335 | 15.493604 | 30.635450 |
| O  | 13.564476 | 11.495788 | 30.639477 |
| O  | 15.551023 | 13.621957 | 30.683412 |
| O  | 11.597680 | 13.377310 | 30.615997 |
| O  | 13.820193 | 9.706760  | 25.382546 |
| H  | 14.630073 | 9.191005  | 25.467152 |
| H  | 9.741132  | 9.454427  | 27.225422 |
| H  | 9.698953  | 13.546777 | 23.069758 |
| H  | 13.390709 | 17.420217 | 23.068159 |
| H  | 13.504243 | 9.521686  | 31.033046 |
| H  | 13.673103 | 17.471214 | 31.008640 |
| H  | 17.461607 | 17.576472 | 27.346792 |
| H  | 17.508301 | 13.847830 | 31.102573 |
| H  | 9.627000  | 13.163232 | 30.969086 |
| H  | 17.722302 | 13.345763 | 23.200799 |
| H  | 9.565771  | 17.332940 | 26.770844 |
| H  | 17.773814 | 9.685393  | 26.866464 |
| H  | 14.366500 | 11.767447 | 22.615580 |
| Ni | 13.145842 | 9.861279  | 23.491190 |
| C  | 11.879926 | 9.722038  | 22.065691 |
| H  | 12.292998 | 9.418729  | 21.089201 |
| C  | 11.692633 | 8.621475  | 23.007222 |
| H  | 11.163247 | 8.896905  | 23.941501 |

|   |           |           |           |
|---|-----------|-----------|-----------|
| H | 11.283589 | 7.658177  | 22.686331 |
| C | 10.895651 | 10.846992 | 21.988294 |
| H | 11.355824 | 11.780391 | 21.637516 |
| H | 10.062621 | 10.610828 | 21.302925 |
| H | 10.440642 | 11.050020 | 22.970680 |
| C | 13.377930 | 7.742205  | 23.156302 |
| H | 13.128853 | 7.212522  | 22.226964 |
| C | 13.226638 | 6.809571  | 24.333526 |
| H | 12.239586 | 6.327612  | 24.349448 |
| H | 13.981212 | 6.008920  | 24.290567 |
| H | 13.346818 | 7.334681  | 25.290333 |
| C | 14.825272 | 8.186075  | 22.898509 |
| H | 14.918865 | 8.865044  | 22.038288 |
| H | 15.347910 | 8.644851  | 23.747629 |
| H | 15.400632 | 7.279684  | 22.637109 |

# F to L TS

|    |           |           |           |
|----|-----------|-----------|-----------|
| C  | 10.482553 | 13.517254 | 23.859342 |
| C  | 13.495921 | 16.642086 | 23.854632 |
| C  | 16.909360 | 13.434764 | 23.954844 |
| C  | 10.368195 | 16.571677 | 26.878757 |
| C  | 13.610901 | 16.682552 | 30.228001 |
| C  | 16.948983 | 10.421995 | 26.990989 |
| C  | 13.577443 | 10.302570 | 30.245526 |
| C  | 16.707663 | 16.768006 | 27.232027 |
| C  | 10.521529 | 10.244945 | 27.157968 |
| C  | 16.745474 | 13.719078 | 30.304595 |
| C  | 10.415721 | 13.285821 | 30.195702 |
| O  | 13.706254 | 11.722043 | 23.299394 |
| Zr | 13.687861 | 13.476248 | 24.537612 |
| O  | 10.069292 | 13.391436 | 25.042988 |
| O  | 11.668931 | 13.612540 | 23.478473 |
| O  | 15.733162 | 13.437342 | 23.508050 |
| O  | 13.624149 | 15.456879 | 23.455993 |
| Zr | 13.721034 | 10.958198 | 27.080095 |
| Zr | 11.114629 | 13.407595 | 27.018125 |
| O  | 15.043295 | 14.945785 | 25.662211 |
| O  | 12.323357 | 11.981465 | 25.585291 |
| O  | 12.576165 | 14.486692 | 26.009116 |
| O  | 14.741309 | 12.483149 | 26.053110 |
| O  | 13.486629 | 17.045741 | 25.045098 |
| O  | 17.271054 | 13.537019 | 25.151833 |
| Zr | 13.553164 | 16.002266 | 27.049302 |
| Zr | 16.149989 | 13.571651 | 27.113439 |
| H  | 11.824197 | 11.393528 | 25.005105 |
| H  | 15.590232 | 15.526261 | 25.125724 |
| H  | 11.572441 | 15.418437 | 29.002961 |
| O  | 12.148614 | 14.875966 | 28.457262 |
| O  | 15.507831 | 17.131279 | 27.142037 |
| O  | 11.545137 | 17.008752 | 26.949934 |

|    |           |           |           |
|----|-----------|-----------|-----------|
| O  | 13.564013 | 17.078695 | 29.035809 |
| Zr | 13.585118 | 13.494629 | 29.578030 |
| O  | 14.626810 | 14.572084 | 28.125324 |
| H  | 15.641108 | 11.593997 | 29.092856 |
| O  | 15.077575 | 12.117080 | 28.516057 |
| O  | 11.711841 | 9.865743  | 27.189911 |
| O  | 15.786716 | 9.950845  | 27.056870 |
| O  | 13.677187 | 9.893924  | 29.061177 |
| O  | 12.595592 | 12.428279 | 28.088926 |
| O  | 17.173741 | 13.674595 | 29.123626 |
| O  | 17.150070 | 15.592157 | 27.194620 |
| O  | 17.291702 | 11.627057 | 27.065137 |
| O  | 10.027333 | 13.328064 | 29.001983 |
| O  | 10.097645 | 11.426807 | 27.052794 |
| O  | 9.998640  | 15.371957 | 26.926967 |
| O  | 13.584560 | 15.493551 | 30.635089 |
| O  | 13.563521 | 11.495918 | 30.639329 |
| O  | 15.550962 | 13.621611 | 30.683132 |
| O  | 11.597680 | 13.376967 | 30.615645 |
| O  | 13.820445 | 9.715237  | 25.372047 |
| H  | 14.588199 | 9.140771  | 25.472852 |
| H  | 9.741654  | 9.453824  | 27.223269 |
| H  | 9.698277  | 13.547080 | 23.070032 |
| H  | 13.391609 | 17.420220 | 23.068040 |
| H  | 13.503153 | 9.521691  | 31.032950 |
| H  | 13.673182 | 17.471173 | 31.008671 |
| H  | 17.461634 | 17.576490 | 27.346427 |
| H  | 17.508107 | 13.847807 | 31.102739 |
| H  | 9.626757  | 13.164945 | 30.969090 |
| H  | 17.722418 | 13.340809 | 23.201609 |
| H  | 9.565727  | 17.332855 | 26.770255 |
| H  | 17.773804 | 9.685608  | 26.866552 |
| H  | 14.365345 | 11.799151 | 22.599435 |
| Ni | 13.216899 | 9.844677  | 23.441475 |
| C  | 12.034111 | 9.725486  | 21.935610 |
| H  | 12.507264 | 9.420513  | 20.989395 |
| C  | 11.776975 | 8.647605  | 22.872191 |
| H  | 11.100849 | 8.877854  | 23.713216 |
| H  | 11.563310 | 7.635662  | 22.515760 |
| C  | 11.097546 | 10.885967 | 21.810079 |
| H  | 11.605665 | 11.806188 | 21.493950 |
| H  | 10.301701 | 10.676582 | 21.074479 |
| H  | 10.594449 | 11.099308 | 22.765099 |
| C  | 13.552975 | 7.860441  | 23.298684 |
| H  | 13.281422 | 7.300750  | 24.205289 |
| H  | 14.523389 | 8.371237  | 23.499120 |
| C  | 13.770539 | 6.975739  | 22.089456 |
| H  | 12.904765 | 6.310624  | 21.934292 |
| H  | 13.832917 | 7.594983  | 21.178782 |
| C  | 15.030357 | 6.138622  | 22.218970 |
| H  | 15.002464 | 5.504191  | 23.116957 |

|   |           |          |           |
|---|-----------|----------|-----------|
| H | 15.163660 | 5.475334 | 21.353690 |
| H | 15.931128 | 6.765374 | 22.291899 |

# **F to M TS**

|    |           |           |           |
|----|-----------|-----------|-----------|
| C  | 10.482561 | 13.517237 | 23.859347 |
| C  | 13.495913 | 16.642078 | 23.854626 |
| C  | 16.909374 | 13.434773 | 23.954836 |
| C  | 10.368199 | 16.571673 | 26.878761 |
| C  | 13.610903 | 16.682548 | 30.228008 |
| C  | 16.948976 | 10.422007 | 26.990982 |
| C  | 13.577433 | 10.302576 | 30.245524 |
| C  | 16.707671 | 16.768006 | 27.232027 |
| C  | 10.521521 | 10.244956 | 27.157967 |
| C  | 16.745473 | 13.719075 | 30.304599 |
| C  | 10.415719 | 13.285819 | 30.195707 |
| O  | 13.786736 | 11.716931 | 23.361547 |
| Zr | 13.687896 | 13.488055 | 24.542080 |
| O  | 10.070926 | 13.417385 | 25.045522 |
| O  | 11.670316 | 13.561681 | 23.468625 |
| O  | 15.735056 | 13.451856 | 23.505681 |
| O  | 13.612259 | 15.455609 | 23.456094 |
| Zr | 13.717479 | 10.953242 | 27.067287 |
| Zr | 11.118087 | 13.413706 | 27.022147 |
| O  | 15.044266 | 14.948328 | 25.662945 |
| O  | 12.308587 | 12.007986 | 25.603054 |
| O  | 12.572787 | 14.500694 | 26.008672 |
| O  | 14.738129 | 12.486919 | 26.057661 |
| O  | 13.493840 | 17.047560 | 25.044169 |
| O  | 17.269670 | 13.528552 | 25.153157 |
| Zr | 13.554391 | 16.006510 | 27.052347 |
| Zr | 16.149830 | 13.569739 | 27.115591 |
| H  | 11.777784 | 11.432249 | 25.035645 |
| H  | 15.592243 | 15.528745 | 25.127447 |
| H  | 11.573384 | 15.415088 | 29.006532 |
| O  | 12.150752 | 14.875029 | 28.459702 |
| O  | 15.508198 | 17.132705 | 27.143916 |
| O  | 11.545294 | 17.009296 | 26.949868 |
| O  | 13.563233 | 17.080166 | 29.036106 |
| Zr | 13.586437 | 13.490342 | 29.577317 |
| O  | 14.626952 | 14.571295 | 28.125791 |
| H  | 15.641340 | 11.591933 | 29.094331 |
| O  | 15.078662 | 12.110361 | 28.512437 |
| O  | 11.710634 | 9.855813  | 27.153485 |
| O  | 15.779316 | 9.961678  | 27.003579 |
| O  | 13.668897 | 9.895997  | 29.058987 |
| O  | 12.597431 | 12.421717 | 28.092217 |
| O  | 17.173824 | 13.674866 | 29.123722 |
| O  | 17.149017 | 15.591803 | 27.193976 |
| O  | 17.297389 | 11.624164 | 27.078131 |
| O  | 10.027374 | 13.328385 | 29.002198 |

|    |           |           |           |
|----|-----------|-----------|-----------|
| O  | 10.101332 | 11.427674 | 27.055443 |
| O  | 9.997457  | 15.373388 | 26.936672 |
| O  | 13.586239 | 15.493364 | 30.633908 |
| O  | 13.568764 | 11.495053 | 30.641855 |
| O  | 15.551164 | 13.617879 | 30.682570 |
| O  | 11.597988 | 13.374895 | 30.615436 |
| O  | 13.762044 | 9.739120  | 25.319992 |
| H  | 14.640621 | 9.354869  | 25.217688 |
| H  | 9.738156  | 9.462397  | 27.262697 |
| H  | 9.696117  | 13.562993 | 23.073282 |
| H  | 13.394692 | 17.419817 | 23.067222 |
| H  | 13.505665 | 9.520065  | 31.031526 |
| H  | 13.672452 | 17.470793 | 31.009125 |
| H  | 17.462569 | 17.575794 | 27.345308 |
| H  | 17.507507 | 13.850955 | 31.102711 |
| H  | 9.626746  | 13.166512 | 30.969330 |
| H  | 17.723592 | 13.335338 | 23.203370 |
| H  | 9.566788  | 17.332805 | 26.762040 |
| H  | 17.770773 | 9.677710  | 26.900042 |
| H  | 14.524865 | 11.722875 | 22.742626 |
| Ni | 12.898310 | 10.014653 | 23.487625 |
| C  | 12.120329 | 8.784232  | 21.975944 |
| H  | 11.128477 | 8.357270  | 21.781796 |
| C  | 12.226095 | 10.195096 | 21.728006 |
| H  | 13.043319 | 10.569780 | 21.101629 |
| H  | 11.310577 | 10.796495 | 21.669632 |
| C  | 13.227776 | 7.876644  | 21.512432 |
| H  | 13.218514 | 6.906726  | 22.027316 |
| H  | 13.117423 | 7.675633  | 20.435664 |
| H  | 14.220786 | 8.324492  | 21.659703 |
| C  | 11.637896 | 8.403248  | 23.864936 |
| H  | 12.225182 | 8.457484  | 24.796065 |
| H  | 11.663110 | 7.341974  | 23.581936 |
| C  | 10.217787 | 8.880591  | 24.082840 |
| H  | 10.214041 | 9.881122  | 24.555436 |
| H  | 9.699866  | 9.032154  | 23.118904 |
| C  | 9.421241  | 7.904421  | 24.931741 |
| H  | 9.939899  | 7.676351  | 25.874496 |
| H  | 8.423776  | 8.293032  | 25.179914 |
| H  | 9.281476  | 6.948012  | 24.406475 |

## J

|   |           |           |           |
|---|-----------|-----------|-----------|
| C | 10.482472 | 13.517337 | 23.859336 |
| C | 13.496088 | 16.642020 | 23.854618 |
| C | 16.909266 | 13.434581 | 23.954900 |
| C | 10.368155 | 16.571681 | 26.878756 |
| C | 13.610859 | 16.682526 | 30.228037 |
| C | 16.949072 | 10.422173 | 26.990900 |
| C | 13.577455 | 10.302597 | 30.245503 |
| C | 16.707647 | 16.768005 | 27.232019 |

|    |           |           |           |
|----|-----------|-----------|-----------|
| C  | 10.521585 | 10.244977 | 27.157976 |
| C  | 16.745460 | 13.719069 | 30.304601 |
| C  | 10.415685 | 13.285780 | 30.195738 |
| O  | 13.731890 | 11.728756 | 23.302533 |
| Zr | 13.686636 | 13.484329 | 24.537471 |
| O  | 10.069649 | 13.402815 | 25.043919 |
| O  | 11.670352 | 13.589479 | 23.475175 |
| O  | 15.732789 | 13.434274 | 23.508991 |
| O  | 13.619628 | 15.456403 | 23.455462 |
| Zr | 13.719408 | 10.954590 | 27.082493 |
| Zr | 11.116614 | 13.410521 | 27.021048 |
| O  | 15.043317 | 14.945393 | 25.661053 |
| O  | 12.314529 | 11.995319 | 25.596901 |
| O  | 12.575192 | 14.494132 | 26.008029 |
| O  | 14.737511 | 12.481055 | 26.052339 |
| O  | 13.490005 | 17.046036 | 25.044630 |
| O  | 17.270595 | 13.535375 | 25.152058 |
| Zr | 13.553720 | 16.004822 | 27.050770 |
| Zr | 16.148490 | 13.569722 | 27.113403 |
| H  | 11.776815 | 11.424715 | 25.030872 |
| H  | 15.592167 | 15.526092 | 25.126680 |
| H  | 11.572311 | 15.417622 | 29.003867 |
| O  | 12.149716 | 14.876213 | 28.458388 |
| O  | 15.507898 | 17.131931 | 27.141866 |
| O  | 11.545190 | 17.009147 | 26.949923 |
| O  | 13.564124 | 17.079004 | 29.035894 |
| Zr | 13.585674 | 13.494053 | 29.579474 |
| O  | 14.626411 | 14.571079 | 28.124723 |
| H  | 15.643208 | 11.594177 | 29.093625 |
| O  | 15.078452 | 12.113845 | 28.514830 |
| O  | 11.712665 | 9.867194  | 27.188576 |
| O  | 15.782936 | 9.956377  | 27.029834 |
| O  | 13.678939 | 9.893888  | 29.061100 |
| O  | 12.597055 | 12.426386 | 28.093328 |
| O  | 17.172760 | 13.674832 | 29.123280 |
| O  | 17.148732 | 15.591683 | 27.193828 |
| O  | 17.293836 | 11.626251 | 27.071146 |
| O  | 10.027887 | 13.327398 | 29.001890 |
| O  | 10.096894 | 11.426378 | 27.051863 |
| O  | 9.998565  | 15.372415 | 26.931166 |
| O  | 13.585689 | 15.493516 | 30.634746 |
| O  | 13.564085 | 11.495696 | 30.639513 |
| O  | 15.551064 | 13.619635 | 30.683339 |
| O  | 11.597501 | 13.377921 | 30.616031 |
| O  | 13.788448 | 9.700968  | 25.370994 |
| H  | 14.626376 | 9.224937  | 25.344822 |
| H  | 9.743064  | 9.452941  | 27.225683 |
| H  | 9.697901  | 13.554843 | 23.070623 |
| H  | 13.392845 | 17.419978 | 23.067781 |
| H  | 13.501460 | 9.521399  | 31.032311 |
| H  | 13.672109 | 17.471054 | 31.008801 |

|    |           |           |           |
|----|-----------|-----------|-----------|
| H  | 17.462088 | 17.575819 | 27.347144 |
| H  | 17.508188 | 13.849249 | 31.102271 |
| H  | 9.626570  | 13.164588 | 30.968844 |
| H  | 17.722192 | 13.343785 | 23.201259 |
| H  | 9.565995  | 17.332651 | 26.766819 |
| H  | 17.772833 | 9.682319  | 26.883181 |
| H  | 14.483751 | 11.715637 | 22.699240 |
| Ni | 12.999901 | 9.991407  | 23.576697 |
| C  | 11.990914 | 9.794149  | 22.003093 |
| H  | 12.650317 | 9.710889  | 21.125390 |
| C  | 10.847864 | 10.753944 | 21.822060 |
| H  | 11.252580 | 11.746074 | 21.556608 |
| H  | 10.327623 | 10.893380 | 22.789391 |
| C  | 11.764170 | 8.528394  | 22.737590 |
| H  | 10.727129 | 8.355745  | 23.064652 |
| H  | 12.164082 | 7.617362  | 22.270620 |
| H  | 12.316761 | 8.500210  | 23.773933 |
| C  | 9.797833  | 10.343257 | 20.776170 |
| H  | 9.381460  | 9.365668  | 21.089907 |
| C  | 8.659494  | 11.350262 | 20.752381 |
| H  | 8.194372  | 11.466977 | 21.742377 |
| H  | 9.019085  | 12.343691 | 20.439596 |
| H  | 7.868151  | 11.055073 | 20.048566 |
| C  | 10.406160 | 10.169639 | 19.393717 |
| H  | 11.173588 | 9.382818  | 19.368985 |
| H  | 9.642197  | 9.901202  | 18.650120 |
| H  | 10.881183 | 11.102845 | 19.050914 |

## K

|    |           |           |           |
|----|-----------|-----------|-----------|
| C  | 10.482472 | 13.517337 | 23.859336 |
| C  | 13.496088 | 16.642020 | 23.854618 |
| C  | 16.909266 | 13.434581 | 23.954900 |
| C  | 10.368155 | 16.571681 | 26.878756 |
| C  | 13.610859 | 16.682526 | 30.228037 |
| C  | 16.949072 | 10.422173 | 26.990900 |
| C  | 13.577455 | 10.302597 | 30.245503 |
| C  | 16.707647 | 16.768005 | 27.232019 |
| C  | 10.521585 | 10.244977 | 27.157976 |
| C  | 16.745460 | 13.719069 | 30.304601 |
| C  | 10.415685 | 13.285780 | 30.195738 |
| O  | 13.748774 | 11.742031 | 23.277307 |
| Zr | 13.687636 | 13.483904 | 24.538038 |
| O  | 10.068600 | 13.411575 | 25.043936 |
| O  | 11.670861 | 13.574715 | 23.474570 |
| O  | 15.733959 | 13.440089 | 23.506923 |
| O  | 13.614946 | 15.455707 | 23.455546 |
| Zr | 13.718162 | 10.955192 | 27.080124 |
| Zr | 11.115892 | 13.410400 | 27.020363 |
| O  | 15.043039 | 14.945670 | 25.660514 |
| O  | 12.315180 | 11.996347 | 25.594543 |

|    |           |           |           |
|----|-----------|-----------|-----------|
| O  | 12.574005 | 14.494856 | 26.007069 |
| O  | 14.739639 | 12.481638 | 26.050215 |
| O  | 13.492020 | 17.046387 | 25.044418 |
| O  | 17.269955 | 13.533572 | 25.152233 |
| Zr | 13.553259 | 16.004387 | 27.050650 |
| Zr | 16.148711 | 13.569670 | 27.113887 |
| H  | 11.790854 | 11.417648 | 25.023681 |
| H  | 15.591716 | 15.527116 | 25.126783 |
| H  | 11.572196 | 15.417784 | 29.003436 |
| O  | 12.149637 | 14.876098 | 28.458265 |
| O  | 15.507943 | 17.131876 | 27.142124 |
| O  | 11.545358 | 17.009072 | 26.948833 |
| O  | 13.563781 | 17.079093 | 29.035919 |
| Zr | 13.585496 | 13.493769 | 29.579218 |
| O  | 14.626424 | 14.571057 | 28.124350 |
| H  | 15.642974 | 11.594012 | 29.092734 |
| O  | 15.078501 | 12.114014 | 28.513976 |
| O  | 11.712370 | 9.867558  | 27.192424 |
| O  | 15.781992 | 9.957621  | 27.022330 |
| O  | 13.680087 | 9.893947  | 29.061271 |
| O  | 12.597408 | 12.427439 | 28.091488 |
| O  | 17.172982 | 13.675315 | 29.123364 |
| O  | 17.148887 | 15.591652 | 27.193038 |
| O  | 17.294620 | 11.625870 | 27.073831 |
| O  | 10.027877 | 13.326865 | 29.001891 |
| O  | 10.097238 | 11.426633 | 27.050443 |
| O  | 9.998059  | 15.372828 | 26.933476 |
| O  | 13.585929 | 15.493421 | 30.634575 |
| O  | 13.563421 | 11.495943 | 30.639276 |
| O  | 15.551022 | 13.619418 | 30.683081 |
| O  | 11.597590 | 13.377851 | 30.615870 |
| O  | 13.771764 | 9.718412  | 25.360430 |
| H  | 14.604974 | 9.234192  | 25.328850 |
| H  | 9.742735  | 9.453174  | 27.223816 |
| H  | 9.697815  | 13.560564 | 23.070906 |
| H  | 13.394720 | 17.420040 | 23.067590 |
| H  | 13.501163 | 9.521656  | 31.032534 |
| H  | 13.672177 | 17.470992 | 31.008868 |
| H  | 17.462111 | 17.575765 | 27.347593 |
| H  | 17.508063 | 13.848927 | 31.102458 |
| H  | 9.626612  | 13.165066 | 30.968956 |
| H  | 17.722964 | 13.340141 | 23.202378 |
| H  | 9.566287  | 17.332811 | 26.765661 |
| H  | 17.772601 | 9.681477  | 26.887302 |
| H  | 14.535617 | 11.728428 | 22.719927 |
| Ni | 13.015243 | 9.997644  | 23.532934 |
| C  | 12.142077 | 9.682520  | 21.875875 |
| C  | 11.769800 | 8.533107  | 22.745383 |
| H  | 10.717294 | 8.510583  | 23.062550 |
| H  | 12.066057 | 7.539349  | 22.375566 |
| H  | 12.331355 | 8.521701  | 23.773495 |

|   |           |           |           |
|---|-----------|-----------|-----------|
| C | 11.010435 | 10.633577 | 21.492408 |
| H | 10.541024 | 10.974560 | 22.436980 |
| C | 9.927309  | 9.917276  | 20.683459 |
| H | 9.106569  | 10.603763 | 20.429968 |
| H | 10.328640 | 9.532693  | 19.732935 |
| H | 9.486160  | 9.067454  | 21.223709 |
| C | 11.506132 | 11.858571 | 20.740254 |
| H | 10.697528 | 12.590607 | 20.604116 |
| H | 12.319176 | 12.362048 | 21.276736 |
| H | 11.862347 | 11.589673 | 19.733737 |
| C | 13.148157 | 9.399726  | 20.787961 |
| H | 12.671690 | 9.026255  | 19.862290 |
| H | 13.702517 | 10.306421 | 20.504222 |
| H | 13.886071 | 8.643304  | 21.092169 |

## L

|    |           |           |           |
|----|-----------|-----------|-----------|
| C  | 10.482472 | 13.517337 | 23.859336 |
| C  | 13.496088 | 16.642020 | 23.854618 |
| C  | 16.909266 | 13.434581 | 23.954900 |
| C  | 10.368155 | 16.571681 | 26.878756 |
| C  | 13.610859 | 16.682526 | 30.228037 |
| C  | 16.949072 | 10.422173 | 26.990900 |
| C  | 13.577455 | 10.302597 | 30.245503 |
| C  | 16.707647 | 16.768005 | 27.232019 |
| C  | 10.521585 | 10.244977 | 27.157976 |
| C  | 16.745460 | 13.719069 | 30.304601 |
| C  | 10.415685 | 13.285780 | 30.195738 |
| O  | 13.733084 | 11.728986 | 23.301738 |
| Zr | 13.686897 | 13.484385 | 24.537601 |
| O  | 10.069602 | 13.404134 | 25.043888 |
| O  | 11.670469 | 13.588697 | 23.475224 |
| O  | 15.732771 | 13.434229 | 23.509000 |
| O  | 13.619620 | 15.456373 | 23.455520 |
| Zr | 13.719365 | 10.954363 | 27.082445 |
| Zr | 11.116735 | 13.410791 | 27.021127 |
| O  | 15.043415 | 14.945396 | 25.661065 |
| O  | 12.314391 | 11.995712 | 25.596964 |
| O  | 12.575227 | 14.494401 | 26.008041 |
| O  | 14.737509 | 12.481034 | 26.052343 |
| O  | 13.490264 | 17.046137 | 25.044626 |
| O  | 17.270605 | 13.535293 | 25.152033 |
| Zr | 13.553760 | 16.004967 | 27.050881 |
| Zr | 16.148498 | 13.569715 | 27.113406 |
| H  | 11.776472 | 11.425132 | 25.030950 |
| H  | 15.592138 | 15.526180 | 25.126660 |
| H  | 11.572297 | 15.417474 | 29.004054 |
| O  | 12.149747 | 14.876249 | 28.458440 |
| O  | 15.507918 | 17.131978 | 27.141866 |
| O  | 11.545202 | 17.009152 | 26.949800 |
| O  | 13.564118 | 17.079060 | 29.035903 |

|    |           |           |           |
|----|-----------|-----------|-----------|
| Zr | 13.585702 | 13.493922 | 29.579455 |
| O  | 14.626410 | 14.571097 | 28.124724 |
| H  | 15.643364 | 11.594221 | 29.093569 |
| O  | 15.078474 | 12.113791 | 28.514818 |
| O  | 11.712612 | 9.866993  | 27.188173 |
| O  | 15.782935 | 9.956410  | 27.029752 |
| O  | 13.678718 | 9.893964  | 29.061114 |
| O  | 12.597033 | 12.426325 | 28.093353 |
| O  | 17.172741 | 13.674799 | 29.123278 |
| O  | 17.148703 | 15.591650 | 27.193854 |
| O  | 17.293819 | 11.626254 | 27.071160 |
| O  | 10.027840 | 13.327532 | 29.001924 |
| O  | 10.096983 | 11.426446 | 27.051934 |
| O  | 9.998522  | 15.372481 | 26.931346 |
| O  | 13.585703 | 15.493507 | 30.634737 |
| O  | 13.564112 | 11.495686 | 30.639572 |
| O  | 15.551080 | 13.619618 | 30.683354 |
| O  | 11.597514 | 13.377938 | 30.616040 |
| O  | 13.787639 | 9.701246  | 25.371031 |
| H  | 14.625328 | 9.224884  | 25.343425 |
| H  | 9.742985  | 9.453025  | 27.225831 |
| H  | 9.698233  | 13.553961 | 23.070147 |
| H  | 13.392564 | 17.419897 | 23.067728 |
| H  | 13.501635 | 9.521388  | 31.032312 |
| H  | 13.672014 | 17.471042 | 31.008830 |
| H  | 17.462139 | 17.575799 | 27.347066 |
| H  | 17.508191 | 13.849364 | 31.102256 |
| H  | 9.626604  | 13.164436 | 30.968856 |
| H  | 17.722169 | 13.343663 | 23.201237 |
| H  | 9.566027  | 17.332650 | 26.766614 |
| H  | 17.772855 | 9.682309  | 26.883493 |
| H  | 14.487423 | 11.714189 | 22.701572 |
| Ni | 12.995596 | 9.994788  | 23.577565 |
| C  | 11.983653 | 9.801626  | 22.007181 |
| H  | 12.630493 | 9.702040  | 21.120451 |
| C  | 10.851459 | 10.771324 | 21.808968 |
| H  | 11.269128 | 11.770954 | 21.603825 |
| H  | 10.279447 | 10.876909 | 22.751574 |
| C  | 11.743781 | 8.541738  | 22.748054 |
| H  | 10.705328 | 8.383220  | 23.077789 |
| H  | 12.131993 | 7.624214  | 22.284122 |
| H  | 12.299003 | 8.511211  | 23.782783 |
| C  | 9.888151  | 10.381551 | 20.691472 |
| H  | 9.469714  | 9.378235  | 20.894302 |
| H  | 10.452935 | 10.271478 | 19.748023 |
| C  | 8.754628  | 11.374208 | 20.495590 |
| H  | 8.197934  | 11.479752 | 21.443728 |
| H  | 9.180977  | 12.374029 | 20.300525 |
| C  | 7.803045  | 10.992887 | 19.380892 |
| H  | 7.333167  | 10.015569 | 19.567459 |
| H  | 6.993295  | 11.725230 | 19.260518 |

|   |          |           |           |
|---|----------|-----------|-----------|
| H | 8.322785 | 10.919604 | 18.413883 |
|---|----------|-----------|-----------|

**M**

|    |           |           |           |
|----|-----------|-----------|-----------|
| C  | 10.482472 | 13.517337 | 23.859336 |
| C  | 13.496088 | 16.642020 | 23.854618 |
| C  | 16.909266 | 13.434581 | 23.954900 |
| C  | 10.368155 | 16.571681 | 26.878756 |
| C  | 13.610859 | 16.682526 | 30.228037 |
| C  | 16.949072 | 10.422173 | 26.990900 |
| C  | 13.577455 | 10.302597 | 30.245503 |
| C  | 16.707647 | 16.768005 | 27.232019 |
| C  | 10.521585 | 10.244977 | 27.157976 |
| C  | 16.745460 | 13.719069 | 30.304601 |
| C  | 10.415685 | 13.285780 | 30.195738 |
| O  | 13.727002 | 11.739546 | 23.285715 |
| Zr | 13.686639 | 13.484098 | 24.536471 |
| O  | 10.068883 | 13.405318 | 25.043309 |
| O  | 11.670224 | 13.592849 | 23.475666 |
| O  | 15.733197 | 13.431968 | 23.508393 |
| O  | 13.620590 | 15.456856 | 23.454692 |
| Zr | 13.719218 | 10.954562 | 27.080793 |
| Zr | 11.116481 | 13.409911 | 27.020772 |
| O  | 15.043388 | 14.945193 | 25.660474 |
| O  | 12.314376 | 11.995353 | 25.595409 |
| O  | 12.574772 | 14.493927 | 26.008110 |
| O  | 14.738847 | 12.480654 | 26.050369 |
| O  | 13.489699 | 17.045690 | 25.044781 |
| O  | 17.270599 | 13.536250 | 25.151786 |
| Zr | 13.553291 | 16.004192 | 27.050569 |
| Zr | 16.148104 | 13.569586 | 27.113284 |
| H  | 11.786350 | 11.418092 | 25.026426 |
| H  | 15.592114 | 15.527037 | 25.127242 |
| H  | 11.572360 | 15.417704 | 29.003941 |
| O  | 12.149555 | 14.876079 | 28.458464 |
| O  | 15.507931 | 17.131886 | 27.141591 |
| O  | 11.545133 | 17.009268 | 26.950070 |
| O  | 13.564069 | 17.079017 | 29.035907 |
| Zr | 13.585537 | 13.493751 | 29.579235 |
| O  | 14.626475 | 14.571040 | 28.124588 |
| H  | 15.643084 | 11.593867 | 29.092564 |
| O  | 15.078409 | 12.114013 | 28.514140 |
| O  | 11.712525 | 9.867828  | 27.191578 |
| O  | 15.783098 | 9.956152  | 27.029492 |
| O  | 13.679793 | 9.893927  | 29.061291 |
| O  | 12.597229 | 12.426845 | 28.092519 |
| O  | 17.172828 | 13.674848 | 29.123308 |
| O  | 17.148853 | 15.591683 | 27.193626 |
| O  | 17.293860 | 11.626339 | 27.070817 |
| O  | 10.027827 | 13.327114 | 29.001931 |
| O  | 10.096587 | 11.426424 | 27.051148 |

|    |           |           |           |
|----|-----------|-----------|-----------|
| O  | 9.998438  | 15.372509 | 26.931331 |
| O  | 13.585655 | 15.493499 | 30.634792 |
| O  | 13.563809 | 11.495825 | 30.639497 |
| O  | 15.551069 | 13.619552 | 30.683301 |
| O  | 11.597511 | 13.377784 | 30.616064 |
| O  | 13.784556 | 9.704328  | 25.369779 |
| H  | 14.613588 | 9.212739  | 25.350279 |
| H  | 9.743112  | 9.452767  | 27.223911 |
| H  | 9.698417  | 13.548858 | 23.069451 |
| H  | 13.392188 | 17.420428 | 23.068239 |
| H  | 13.500952 | 9.521528  | 31.032414 |
| H  | 13.672145 | 17.471080 | 31.008809 |
| H  | 17.462039 | 17.575851 | 27.347592 |
| H  | 17.508171 | 13.849259 | 31.102320 |
| H  | 9.626557  | 13.164961 | 30.968917 |
| H  | 17.722590 | 13.344599 | 23.201422 |
| H  | 9.566048  | 17.332687 | 26.766431 |
| H  | 17.773063 | 9.682410  | 26.883959 |
| H  | 14.518952 | 11.712968 | 22.735825 |
| Ni | 13.007600 | 9.984862  | 23.562712 |
| C  | 12.061065 | 9.783088  | 21.935142 |
| C  | 10.925563 | 10.772025 | 21.791925 |
| H  | 11.357734 | 11.783856 | 21.732279 |
| H  | 10.310427 | 10.758833 | 22.711854 |
| C  | 11.802526 | 8.528309  | 22.687923 |
| H  | 10.758081 | 8.370227  | 22.993761 |
| H  | 12.201365 | 7.609076  | 22.232978 |
| H  | 12.336634 | 8.496886  | 23.736160 |
| C  | 12.977812 | 9.698964  | 20.743494 |
| H  | 12.475914 | 9.268881  | 19.857164 |
| H  | 13.327862 | 10.700130 | 20.449565 |
| H  | 13.862448 | 9.073775  | 20.936294 |
| C  | 10.014180 | 10.549032 | 20.582138 |
| H  | 9.244715  | 11.338369 | 20.579039 |
| H  | 10.592059 | 10.712367 | 19.656494 |
| C  | 9.351809  | 9.187455  | 20.538411 |
| H  | 10.086744 | 8.371810  | 20.450854 |
| H  | 8.760092  | 8.993730  | 21.446867 |
| H  | 8.669016  | 9.092419  | 19.682997 |

#### J to N TS

|   |           |           |           |
|---|-----------|-----------|-----------|
| C | 10.482472 | 13.517337 | 23.859336 |
| C | 13.496088 | 16.642020 | 23.854618 |
| C | 16.909266 | 13.434581 | 23.954900 |
| C | 10.368155 | 16.571681 | 26.878756 |
| C | 13.610859 | 16.682526 | 30.228037 |
| C | 16.949072 | 10.422173 | 26.990900 |
| C | 13.577455 | 10.302597 | 30.245503 |
| C | 16.707647 | 16.768005 | 27.232019 |
| C | 10.521585 | 10.244977 | 27.157976 |

|    |           |           |           |
|----|-----------|-----------|-----------|
| C  | 16.745460 | 13.719069 | 30.304601 |
| C  | 10.415685 | 13.285780 | 30.195738 |
| O  | 13.732804 | 11.718102 | 23.328948 |
| Zr | 13.683850 | 13.475661 | 24.532552 |
| O  | 10.074463 | 13.410011 | 25.045031 |
| O  | 11.667171 | 13.559381 | 23.460639 |
| O  | 15.732628 | 13.424735 | 23.509746 |
| O  | 13.609132 | 15.455219 | 23.455175 |
| Zr | 13.723852 | 10.962624 | 27.082919 |
| Zr | 11.116953 | 13.408915 | 27.023320 |
| O  | 15.041752 | 14.944140 | 25.658779 |
| O  | 12.313678 | 11.983764 | 25.597156 |
| O  | 12.570856 | 14.489083 | 26.005348 |
| O  | 14.734751 | 12.487179 | 26.058792 |
| O  | 13.492204 | 17.045784 | 25.044821 |
| O  | 17.271043 | 13.540438 | 25.150995 |
| Zr | 13.552871 | 16.000921 | 27.048069 |
| Zr | 16.150136 | 13.572001 | 27.113436 |
| H  | 11.771693 | 11.408368 | 25.042620 |
| H  | 15.589277 | 15.528749 | 25.127320 |
| H  | 11.572368 | 15.417876 | 29.002247 |
| O  | 12.149950 | 14.874972 | 28.458428 |
| O  | 15.507696 | 17.130612 | 27.141086 |
| O  | 11.545716 | 17.008019 | 26.947901 |
| O  | 13.563805 | 17.077369 | 29.035543 |
| Zr | 13.587506 | 13.496029 | 29.582270 |
| O  | 14.626508 | 14.571996 | 28.125532 |
| H  | 15.643082 | 11.592145 | 29.092453 |
| O  | 15.079375 | 12.117808 | 28.518063 |
| O  | 11.714579 | 9.870921  | 27.193735 |
| O  | 15.784566 | 9.954389  | 27.055220 |
| O  | 13.680349 | 9.896919  | 29.060017 |
| O  | 12.600468 | 12.426998 | 28.093701 |
| O  | 17.172680 | 13.675997 | 29.123398 |
| O  | 17.149828 | 15.591969 | 27.193315 |
| O  | 17.292133 | 11.627905 | 27.062189 |
| O  | 10.027992 | 13.326995 | 29.001900 |
| O  | 10.095974 | 11.426608 | 27.052221 |
| O  | 9.997744  | 15.372694 | 26.934220 |
| O  | 13.585201 | 15.493723 | 30.636247 |
| O  | 13.564262 | 11.495161 | 30.641331 |
| O  | 15.551162 | 13.621940 | 30.684226 |
| O  | 11.597593 | 13.377163 | 30.615866 |
| O  | 13.841432 | 9.750253  | 25.331205 |
| H  | 14.491428 | 9.044573  | 25.414322 |
| H  | 9.745109  | 9.451205  | 27.220539 |
| H  | 9.690932  | 13.577962 | 23.078036 |
| H  | 13.399681 | 17.421207 | 23.068064 |
| H  | 13.499860 | 9.519709  | 31.030347 |
| H  | 13.672699 | 17.471670 | 31.008119 |
| H  | 17.461400 | 17.576298 | 27.348259 |

|    |           |           |           |
|----|-----------|-----------|-----------|
| H  | 17.508665 | 13.846273 | 31.102340 |
| H  | 9.626475  | 13.165553 | 30.968851 |
| H  | 17.722118 | 13.347512 | 23.200606 |
| H  | 9.566542  | 17.333076 | 26.765943 |
| H  | 17.772377 | 9.683999  | 26.870800 |
| H  | 14.569381 | 11.682029 | 22.849744 |
| Ni | 13.057020 | 9.859170  | 23.565859 |
| C  | 11.986192 | 10.065207 | 21.914863 |
| H  | 12.541012 | 10.828808 | 21.360859 |
| C  | 10.548008 | 10.360072 | 22.208585 |
| H  | 10.480481 | 11.247711 | 22.863086 |
| H  | 10.110786 | 9.526214  | 22.783835 |
| C  | 12.510655 | 8.765632  | 21.996465 |
| H  | 11.839734 | 7.907472  | 22.108267 |
| H  | 13.461118 | 8.516332  | 21.510924 |
| H  | 12.617454 | 8.492808  | 23.762133 |
| C  | 9.679501  | 10.631961 | 20.968935 |
| H  | 9.734420  | 9.732249  | 20.326483 |
| C  | 8.230842  | 10.828490 | 21.385187 |
| H  | 7.841240  | 9.963385  | 21.940515 |
| H  | 8.121084  | 11.708755 | 22.038334 |
| H  | 7.577801  | 10.985457 | 20.515176 |
| C  | 10.190039 | 11.819137 | 20.166650 |
| H  | 11.190948 | 11.646461 | 19.747907 |
| H  | 9.522728  | 12.046072 | 19.323288 |
| H  | 10.254191 | 12.724701 | 20.790634 |

#### K to O TS

|    |           |           |           |
|----|-----------|-----------|-----------|
| C  | 10.482472 | 13.517337 | 23.859336 |
| C  | 13.496088 | 16.642020 | 23.854618 |
| C  | 16.909266 | 13.434581 | 23.954900 |
| C  | 10.368155 | 16.571681 | 26.878756 |
| C  | 13.610859 | 16.682526 | 30.228037 |
| C  | 16.949072 | 10.422173 | 26.990900 |
| C  | 13.577455 | 10.302597 | 30.245503 |
| C  | 16.707647 | 16.768005 | 27.232019 |
| C  | 10.521585 | 10.244977 | 27.157976 |
| C  | 16.745460 | 13.719069 | 30.304601 |
| C  | 10.415685 | 13.285780 | 30.195738 |
| O  | 13.745242 | 11.734669 | 23.315747 |
| Zr | 13.687872 | 13.483990 | 24.535356 |
| O  | 10.067787 | 13.417685 | 25.042320 |
| O  | 11.671887 | 13.572840 | 23.473482 |
| O  | 15.733682 | 13.429821 | 23.508414 |
| O  | 13.613926 | 15.456333 | 23.453485 |
| Zr | 13.724218 | 10.966922 | 27.076903 |
| Zr | 11.118248 | 13.412491 | 27.024946 |
| O  | 15.044520 | 14.947052 | 25.659751 |
| O  | 12.308662 | 12.005277 | 25.608284 |
| O  | 12.572295 | 14.497029 | 26.008363 |

|    |           |           |           |
|----|-----------|-----------|-----------|
| O  | 14.737592 | 12.490094 | 26.057070 |
| O  | 13.492503 | 17.045578 | 25.044623 |
| O  | 17.270793 | 13.538551 | 25.151304 |
| Zr | 13.553746 | 16.003359 | 27.050602 |
| Zr | 16.152487 | 13.572203 | 27.115038 |
| H  | 11.779299 | 11.413263 | 25.058332 |
| H  | 15.592261 | 15.532093 | 25.129026 |
| H  | 11.572908 | 15.417930 | 29.005419 |
| O  | 12.150207 | 14.875712 | 28.460635 |
| O  | 15.508057 | 17.131458 | 27.141950 |
| O  | 11.544988 | 17.009292 | 26.950094 |
| O  | 13.563553 | 17.078458 | 29.035957 |
| Zr | 13.588702 | 13.495222 | 29.582997 |
| O  | 14.627616 | 14.572641 | 28.126199 |
| H  | 15.644939 | 11.591692 | 29.091029 |
| O  | 15.081772 | 12.118614 | 28.517319 |
| O  | 11.714701 | 9.871621  | 27.195191 |
| O  | 15.780774 | 9.959807  | 27.037138 |
| O  | 13.681498 | 9.899503  | 29.058873 |
| O  | 12.602942 | 12.427702 | 28.095904 |
| O  | 17.173475 | 13.677301 | 29.123739 |
| O  | 17.150108 | 15.592126 | 27.193680 |
| O  | 17.295185 | 11.627112 | 27.066570 |
| O  | 10.028604 | 13.326594 | 29.001660 |
| O  | 10.095899 | 11.426731 | 27.052139 |
| O  | 9.998163  | 15.372623 | 26.934981 |
| O  | 13.585886 | 15.493822 | 30.635978 |
| O  | 13.565682 | 11.494648 | 30.643220 |
| O  | 15.551338 | 13.621523 | 30.684181 |
| O  | 11.597375 | 13.376836 | 30.616390 |
| O  | 13.786238 | 9.795293  | 25.290948 |
| H  | 14.323792 | 8.999096  | 25.360250 |
| H  | 9.745179  | 9.450918  | 27.219368 |
| H  | 9.699779  | 13.550041 | 23.067303 |
| H  | 13.394907 | 17.421145 | 23.068531 |
| H  | 13.497701 | 9.518297  | 31.028689 |
| H  | 13.672267 | 17.471423 | 31.008460 |
| H  | 17.461781 | 17.576154 | 27.347325 |
| H  | 17.508476 | 13.845616 | 31.102667 |
| H  | 9.625949  | 13.166158 | 30.968417 |
| H  | 17.722680 | 13.344625 | 23.201456 |
| H  | 9.566065  | 17.332222 | 26.763306 |
| H  | 17.770665 | 9.680538  | 26.882662 |
| H  | 14.618592 | 11.662057 | 22.913977 |
| Ni | 12.904369 | 9.957274  | 23.554094 |
| C  | 12.207538 | 9.893739  | 21.658408 |
| C  | 11.279594 | 9.392428  | 22.603480 |
| H  | 10.486358 | 10.060343 | 22.970965 |
| H  | 10.967986 | 8.342559  | 22.580871 |
| H  | 12.317910 | 8.669524  | 23.829021 |
| C  | 11.955919 | 11.245766 | 21.005535 |

|   |           |           |           |
|---|-----------|-----------|-----------|
| H | 11.740284 | 11.969893 | 21.805083 |
| C | 10.718824 | 11.154959 | 20.109505 |
| H | 10.513698 | 12.122921 | 19.629432 |
| H | 10.851534 | 10.416620 | 19.302736 |
| H | 9.819824  | 10.867827 | 20.673643 |
| C | 13.138328 | 11.775524 | 20.209658 |
| H | 12.942707 | 12.801989 | 19.869632 |
| H | 14.062589 | 11.805975 | 20.800039 |
| H | 13.332980 | 11.171373 | 19.309625 |
| C | 13.050737 | 8.917401  | 20.888580 |
| H | 12.660272 | 8.780851  | 19.864796 |
| H | 14.086820 | 9.269981  | 20.771778 |
| H | 13.083497 | 7.928091  | 21.363868 |

# **L to P TS**

|    |           |           |           |
|----|-----------|-----------|-----------|
| C  | 10.482472 | 13.517337 | 23.859336 |
| C  | 13.496088 | 16.642020 | 23.854618 |
| C  | 16.909266 | 13.434581 | 23.954900 |
| C  | 10.368155 | 16.571681 | 26.878756 |
| C  | 13.610859 | 16.682526 | 30.228037 |
| C  | 16.949072 | 10.422173 | 26.990900 |
| C  | 13.577455 | 10.302597 | 30.245503 |
| C  | 16.707647 | 16.768005 | 27.232019 |
| C  | 10.521585 | 10.244977 | 27.157976 |
| C  | 16.745460 | 13.719069 | 30.304601 |
| C  | 10.415685 | 13.285780 | 30.195738 |
| O  | 13.703501 | 11.714898 | 23.334089 |
| Zr | 13.682632 | 13.474439 | 24.531790 |
| O  | 10.072588 | 13.404201 | 25.044784 |
| O  | 11.667045 | 13.546116 | 23.461066 |
| O  | 15.731254 | 13.411514 | 23.513312 |
| O  | 13.606265 | 15.454666 | 23.455662 |
| Zr | 13.726298 | 10.960618 | 27.085339 |
| Zr | 11.119059 | 13.409336 | 27.025503 |
| O  | 15.042004 | 14.943447 | 25.657878 |
| O  | 12.312659 | 11.988567 | 25.610260 |
| O  | 12.569703 | 14.491354 | 26.003927 |
| O  | 14.734899 | 12.485704 | 26.058651 |
| O  | 13.493602 | 17.046426 | 25.044583 |
| O  | 17.272684 | 13.543951 | 25.150291 |
| Zr | 13.553260 | 16.001073 | 27.047593 |
| Zr | 16.149876 | 13.572050 | 27.112564 |
| H  | 11.757469 | 11.422089 | 25.059237 |
| H  | 15.589986 | 15.528820 | 25.127729 |
| H  | 11.572790 | 15.419035 | 29.002107 |
| O  | 12.150305 | 14.875604 | 28.458762 |
| O  | 15.507727 | 17.130646 | 27.140499 |
| O  | 11.545595 | 17.008340 | 26.948190 |
| O  | 13.564148 | 17.077244 | 29.035503 |
| Zr | 13.587788 | 13.496198 | 29.583107 |

|    |           |           |           |
|----|-----------|-----------|-----------|
| O  | 14.626333 | 14.571724 | 28.125107 |
| H  | 15.644678 | 11.592690 | 29.092845 |
| O  | 15.080174 | 12.117345 | 28.518311 |
| O  | 11.714839 | 9.871221  | 27.193001 |
| O  | 15.785685 | 9.953016  | 27.059201 |
| O  | 13.680844 | 9.896305  | 29.060343 |
| O  | 12.600530 | 12.426310 | 28.098484 |
| O  | 17.172377 | 13.675752 | 29.123281 |
| O  | 17.149690 | 15.591971 | 27.193552 |
| O  | 17.291464 | 11.628220 | 27.059774 |
| O  | 10.028198 | 13.326204 | 29.001793 |
| O  | 10.094227 | 11.425641 | 27.049335 |
| O  | 9.997967  | 15.372578 | 26.933890 |
| O  | 13.585299 | 15.493856 | 30.636546 |
| O  | 13.565186 | 11.494964 | 30.641587 |
| O  | 15.551313 | 13.621802 | 30.684616 |
| O  | 11.597202 | 13.378302 | 30.616481 |
| O  | 13.852373 | 9.744811  | 25.336567 |
| H  | 14.523185 | 9.057606  | 25.401701 |
| H  | 9.745853  | 9.450276  | 27.222232 |
| H  | 9.691873  | 13.600215 | 23.079126 |
| H  | 13.400815 | 17.420983 | 23.067699 |
| H  | 13.498546 | 9.519742  | 31.030296 |
| H  | 13.672395 | 17.471830 | 31.008008 |
| H  | 17.461358 | 17.576283 | 27.348571 |
| H  | 17.508883 | 13.846634 | 31.102085 |
| H  | 9.626208  | 13.165188 | 30.968552 |
| H  | 17.720853 | 13.355564 | 23.198435 |
| H  | 9.566424  | 17.332967 | 26.765839 |
| H  | 17.772905 | 9.684741  | 26.869393 |
| H  | 14.563589 | 11.619882 | 22.907812 |
| Ni | 12.956576 | 9.889371  | 23.627031 |
| C  | 11.668874 | 10.143933 | 22.164408 |
| H  | 12.120595 | 10.934818 | 21.555608 |
| C  | 10.283751 | 10.403803 | 22.683125 |
| H  | 10.319816 | 11.041083 | 23.589626 |
| H  | 9.834086  | 9.458561  | 23.034197 |
| C  | 12.203940 | 8.840761  | 22.123964 |
| H  | 11.545293 | 7.974530  | 22.253744 |
| H  | 13.079713 | 8.623206  | 21.501147 |
| H  | 12.517202 | 8.508972  | 23.762813 |
| C  | 9.367328  | 11.079240 | 21.671770 |
| H  | 9.310700  | 10.462090 | 20.757535 |
| H  | 9.831032  | 12.028465 | 21.346673 |
| C  | 7.970020  | 11.338240 | 22.210095 |
| H  | 7.495605  | 10.374464 | 22.463958 |
| H  | 8.044093  | 11.877027 | 23.171669 |
| C  | 7.090747  | 12.112030 | 21.250541 |
| H  | 6.976260  | 11.586205 | 20.290850 |
| H  | 6.083232  | 12.275228 | 21.655826 |
| H  | 7.515423  | 13.102077 | 21.024666 |

**M to Q TS**

|    |           |           |           |
|----|-----------|-----------|-----------|
| C  | 10.482472 | 13.517337 | 23.859336 |
| C  | 13.496088 | 16.642020 | 23.854618 |
| C  | 16.909266 | 13.434581 | 23.954900 |
| C  | 10.368155 | 16.571681 | 26.878756 |
| C  | 13.610859 | 16.682526 | 30.228037 |
| C  | 16.949072 | 10.422173 | 26.990900 |
| C  | 13.577455 | 10.302597 | 30.245503 |
| C  | 16.707647 | 16.768005 | 27.232019 |
| C  | 10.521585 | 10.244977 | 27.157976 |
| C  | 16.745460 | 13.719069 | 30.304601 |
| C  | 10.415685 | 13.285780 | 30.195738 |
| O  | 13.700027 | 11.716548 | 23.334042 |
| Zr | 13.685314 | 13.474534 | 24.534202 |
| O  | 10.071631 | 13.411172 | 25.044085 |
| O  | 11.668608 | 13.570832 | 23.466423 |
| O  | 15.731577 | 13.413598 | 23.512230 |
| O  | 13.612765 | 15.455561 | 23.455070 |
| Zr | 13.725308 | 10.962426 | 27.083517 |
| Zr | 11.118469 | 13.410400 | 27.024778 |
| O  | 15.043623 | 14.944579 | 25.659054 |
| O  | 12.309512 | 11.990846 | 25.605124 |
| O  | 12.572245 | 14.491097 | 26.006968 |
| O  | 14.735097 | 12.488483 | 26.060796 |
| O  | 13.492067 | 17.046041 | 25.044750 |
| O  | 17.272171 | 13.543107 | 25.150447 |
| Zr | 13.553565 | 16.001388 | 27.048400 |
| Zr | 16.150862 | 13.572514 | 27.113770 |
| H  | 11.765568 | 11.414702 | 25.052249 |
| H  | 15.590781 | 15.530094 | 25.128276 |
| H  | 11.572864 | 15.418724 | 29.003575 |
| O  | 12.149984 | 14.875730 | 28.459386 |
| O  | 15.507832 | 17.130825 | 27.140828 |
| O  | 11.545432 | 17.008443 | 26.948549 |
| O  | 13.563933 | 17.077616 | 29.035660 |
| Zr | 13.587758 | 13.496015 | 29.582639 |
| O  | 14.627065 | 14.572469 | 28.126340 |
| H  | 15.643548 | 11.592240 | 29.093410 |
| O  | 15.079990 | 12.117667 | 28.518673 |
| O  | 11.715045 | 9.870984  | 27.189037 |
| O  | 15.785103 | 9.953887  | 27.057478 |
| O  | 13.679552 | 9.896823  | 29.060012 |
| O  | 12.600235 | 12.426891 | 28.096681 |
| O  | 17.172933 | 13.675727 | 29.123517 |
| O  | 17.150117 | 15.592154 | 27.194384 |
| O  | 17.292020 | 11.628070 | 27.060904 |
| O  | 10.028107 | 13.326834 | 29.001853 |
| O  | 10.094361 | 11.425825 | 27.051774 |
| O  | 9.997936  | 15.372603 | 26.933892 |
| O  | 13.585100 | 15.493872 | 30.636486 |

|    |           |           |           |
|----|-----------|-----------|-----------|
| O  | 13.565238 | 11.494968 | 30.641826 |
| O  | 15.551315 | 13.621983 | 30.684447 |
| O  | 11.597286 | 13.377634 | 30.616397 |
| O  | 13.853616 | 9.765879  | 25.325384 |
| H  | 14.515775 | 9.070105  | 25.390694 |
| H  | 9.745944  | 9.450335  | 27.223861 |
| H  | 9.694135  | 13.564229 | 23.073536 |
| H  | 13.396691 | 17.420937 | 23.068107 |
| H  | 13.499552 | 9.519553  | 31.030214 |
| H  | 13.672681 | 17.471711 | 31.008139 |
| H  | 17.461383 | 17.576451 | 27.347704 |
| H  | 17.508715 | 13.846480 | 31.102305 |
| H  | 9.626228  | 13.165164 | 30.968592 |
| H  | 17.721258 | 13.354631 | 23.198956 |
| H  | 9.566318  | 17.332841 | 26.765596 |
| H  | 17.772533 | 9.684269  | 26.869968 |
| H  | 14.540889 | 11.645611 | 22.866748 |
| Ni | 12.968977 | 9.875454  | 23.601331 |
| C  | 11.672974 | 10.067760 | 22.077117 |
| C  | 10.311872 | 10.263031 | 22.706618 |
| H  | 10.338334 | 11.140948 | 23.376322 |
| H  | 10.081700 | 9.402527  | 23.358000 |
| C  | 12.250068 | 8.779309  | 22.113360 |
| H  | 11.630262 | 7.900734  | 22.321665 |
| H  | 13.113311 | 8.557672  | 21.472589 |
| H  | 12.524581 | 8.524229  | 23.847338 |
| C  | 12.094187 | 11.081937 | 21.057745 |
| H  | 11.474110 | 10.979340 | 20.150398 |
| H  | 11.976628 | 12.108463 | 21.429928 |
| H  | 13.138729 | 10.949244 | 20.748491 |
| C  | 9.173657  | 10.459007 | 21.704172 |
| H  | 8.245330  | 10.645480 | 22.267259 |
| H  | 9.349821  | 11.380541 | 21.123718 |
| C  | 8.987373  | 9.281505  | 20.769764 |
| H  | 9.880940  | 9.098504  | 20.153230 |
| H  | 8.786920  | 8.353446  | 21.326667 |
| H  | 8.146064  | 9.435912  | 20.080890 |

## N

|   |           |           |           |
|---|-----------|-----------|-----------|
| C | 10.482544 | 13.517259 | 23.859349 |
| C | 13.495917 | 16.642094 | 23.854636 |
| C | 16.909358 | 13.434763 | 23.954851 |
| C | 10.368193 | 16.571681 | 26.878756 |
| C | 13.610903 | 16.682558 | 30.227995 |
| C | 16.948991 | 10.421979 | 26.991002 |
| C | 13.577434 | 10.302560 | 30.245525 |
| C | 16.707661 | 16.768011 | 27.232022 |
| C | 10.521536 | 10.244937 | 27.157959 |
| C | 16.745480 | 13.719082 | 30.304592 |
| C | 10.415725 | 13.285823 | 30.195699 |

|    |           |           |           |
|----|-----------|-----------|-----------|
| O  | 13.730644 | 11.730783 | 23.312985 |
| Zr | 13.686442 | 13.482050 | 24.525487 |
| O  | 10.071356 | 13.407862 | 25.043359 |
| O  | 11.669832 | 13.574250 | 23.468186 |
| O  | 15.732906 | 13.426309 | 23.510716 |
| O  | 13.613084 | 15.456288 | 23.453692 |
| Zr | 13.728394 | 10.970691 | 27.083763 |
| Zr | 11.121235 | 13.413702 | 27.025211 |
| O  | 15.043453 | 14.941322 | 25.659018 |
| O  | 12.307602 | 12.000161 | 25.605730 |
| O  | 12.573655 | 14.493282 | 26.006464 |
| O  | 14.734471 | 12.476807 | 26.050805 |
| O  | 13.492668 | 17.044573 | 25.045062 |
| O  | 17.271181 | 13.542303 | 25.151024 |
| Zr | 13.554973 | 16.001958 | 27.048750 |
| Zr | 16.154122 | 13.569386 | 27.112160 |
| H  | 11.735042 | 11.428324 | 25.078873 |
| H  | 15.594730 | 15.523287 | 25.128380 |
| H  | 11.573547 | 15.417407 | 29.003948 |
| O  | 12.151592 | 14.874757 | 28.460324 |
| O  | 15.507776 | 17.130615 | 27.140172 |
| O  | 11.545325 | 17.008300 | 26.949987 |
| O  | 13.565292 | 17.076835 | 29.035458 |
| Zr | 13.590648 | 13.497140 | 29.585996 |
| O  | 14.626690 | 14.568966 | 28.123331 |
| H  | 15.647481 | 11.589005 | 29.085037 |
| O  | 15.082011 | 12.122558 | 28.519651 |
| O  | 11.716050 | 9.871715  | 27.195447 |
| O  | 15.783613 | 9.961218  | 27.074975 |
| O  | 13.678640 | 9.901785  | 29.057564 |
| O  | 12.604564 | 12.424707 | 28.098013 |
| O  | 17.172102 | 13.677321 | 29.123155 |
| O  | 17.149302 | 15.591631 | 27.193912 |
| O  | 17.294654 | 11.629679 | 27.053632 |
| O  | 10.029834 | 13.325299 | 29.001066 |
| O  | 10.096470 | 11.425877 | 27.045783 |
| O  | 9.998811  | 15.372012 | 26.933115 |
| O  | 13.586107 | 15.493840 | 30.636646 |
| O  | 13.567282 | 11.493951 | 30.644233 |
| O  | 15.551270 | 13.624343 | 30.685219 |
| O  | 11.597495 | 13.376722 | 30.616484 |
| O  | 13.806593 | 9.738911  | 25.303882 |
| H  | 13.998633 | 8.813203  | 25.489883 |
| H  | 9.746069  | 9.450331  | 27.221967 |
| H  | 9.695757  | 13.563626 | 23.072756 |
| H  | 13.395402 | 17.421366 | 23.068851 |
| H  | 13.498594 | 9.516707  | 31.026964 |
| H  | 13.670633 | 17.471875 | 31.007967 |
| H  | 17.461530 | 17.576012 | 27.348416 |
| H  | 17.509413 | 13.843211 | 31.101997 |
| H  | 9.625565  | 13.167476 | 30.968001 |

|    |           |           |           |
|----|-----------|-----------|-----------|
| H  | 17.721884 | 13.345465 | 23.200799 |
| H  | 9.566019  | 17.332219 | 26.765166 |
| H  | 17.768667 | 9.681903  | 26.863722 |
| H  | 14.607346 | 11.633013 | 22.922970 |
| Ni | 12.894922 | 9.932112  | 23.639988 |
| C  | 11.400612 | 10.405181 | 22.382964 |
| H  | 11.507181 | 11.495250 | 22.302168 |
| H  | 12.282955 | 8.642533  | 23.896777 |
| C  | 12.376318 | 9.635892  | 21.749287 |
| H  | 12.203235 | 8.577081  | 21.532115 |
| H  | 13.161723 | 10.124548 | 21.163942 |
| C  | 10.058791 | 9.913915  | 22.827175 |
| H  | 9.833232  | 10.309852 | 23.835266 |
| H  | 10.068072 | 8.815007  | 22.931092 |
| C  | 8.920643  | 10.330125 | 21.880953 |
| H  | 8.969668  | 11.430077 | 21.767394 |
| C  | 9.088287  | 9.711003  | 20.502712 |
| H  | 9.068336  | 8.610603  | 20.559209 |
| H  | 8.279113  | 10.016777 | 19.824586 |
| H  | 10.038298 | 9.997801  | 20.029521 |
| C  | 7.573747  | 9.980431  | 22.491600 |
| H  | 6.743222  | 10.291423 | 21.842354 |
| H  | 7.478793  | 8.893855  | 22.644518 |
| H  | 7.430583  | 10.463683 | 23.468844 |

## O

|    |           |           |           |
|----|-----------|-----------|-----------|
| C  | 10.482544 | 13.517259 | 23.859349 |
| C  | 13.495917 | 16.642094 | 23.854636 |
| C  | 16.909358 | 13.434763 | 23.954851 |
| C  | 10.368193 | 16.571681 | 26.878756 |
| C  | 13.610903 | 16.682558 | 30.227995 |
| C  | 16.948991 | 10.421979 | 26.991002 |
| C  | 13.577434 | 10.302560 | 30.245525 |
| C  | 16.707661 | 16.768011 | 27.232022 |
| C  | 10.521536 | 10.244937 | 27.157959 |
| C  | 16.745480 | 13.719082 | 30.304592 |
| C  | 10.415725 | 13.285823 | 30.195699 |
| O  | 13.703896 | 11.724424 | 23.308753 |
| Zr | 13.686887 | 13.476059 | 24.532095 |
| O  | 10.070168 | 13.396556 | 25.042911 |
| O  | 11.668915 | 13.611211 | 23.476557 |
| O  | 15.732675 | 13.427497 | 23.509400 |
| O  | 13.623253 | 15.457329 | 23.454652 |
| Zr | 13.725538 | 10.973499 | 27.084434 |
| Zr | 11.115183 | 13.409193 | 27.018913 |
| O  | 15.043570 | 14.943878 | 25.661526 |
| O  | 12.322070 | 11.983929 | 25.589307 |
| O  | 12.574895 | 14.485631 | 26.010317 |
| O  | 14.740781 | 12.482786 | 26.055444 |
| O  | 13.486777 | 17.044201 | 25.045724 |

|    |           |           |           |
|----|-----------|-----------|-----------|
| O  | 17.270997 | 13.542716 | 25.150940 |
| Zr | 13.553583 | 16.000575 | 27.048595 |
| Zr | 16.154439 | 13.572221 | 27.113506 |
| H  | 11.820751 | 11.390045 | 25.018436 |
| H  | 15.590413 | 15.526842 | 25.127560 |
| H  | 11.572541 | 15.417453 | 29.003271 |
| O  | 12.149345 | 14.874381 | 28.458763 |
| O  | 15.507628 | 17.130119 | 27.141444 |
| O  | 11.545145 | 17.008079 | 26.950676 |
| O  | 13.564544 | 17.077055 | 29.035605 |
| Zr | 13.588108 | 13.497829 | 29.583466 |
| O  | 14.627074 | 14.570585 | 28.125486 |
| H  | 15.641961 | 11.589495 | 29.089472 |
| O  | 15.079341 | 12.121647 | 28.519992 |
| O  | 11.715355 | 9.871139  | 27.190832 |
| O  | 15.784309 | 9.957311  | 27.071269 |
| O  | 13.677827 | 9.899734  | 29.058570 |
| O  | 12.600661 | 12.427387 | 28.091521 |
| O  | 17.173269 | 13.676160 | 29.123661 |
| O  | 17.150653 | 15.592207 | 27.195029 |
| O  | 17.293706 | 11.628355 | 27.058982 |
| O  | 10.028806 | 13.326484 | 29.001393 |
| O  | 10.096144 | 11.426141 | 27.052367 |
| O  | 9.998625  | 15.371650 | 26.928365 |
| O  | 13.584771 | 15.493739 | 30.636517 |
| O  | 13.564639 | 11.494803 | 30.642367 |
| O  | 15.550985 | 13.624221 | 30.684237 |
| O  | 11.597709 | 13.376206 | 30.615995 |
| O  | 13.841802 | 9.739209  | 25.326786 |
| H  | 14.331971 | 8.928712  | 25.506734 |
| H  | 9.745384  | 9.450760  | 27.222006 |
| H  | 9.698021  | 13.539597 | 23.070026 |
| H  | 13.392250 | 17.421313 | 23.069125 |
| H  | 13.501607 | 9.518329  | 31.029049 |
| H  | 13.672462 | 17.471639 | 31.008115 |
| H  | 17.461167 | 17.576764 | 27.346530 |
| H  | 17.508691 | 13.844219 | 31.102630 |
| H  | 9.626070  | 13.166948 | 30.968521 |
| H  | 17.722076 | 13.344079 | 23.201120 |
| H  | 9.565779  | 17.332518 | 26.768598 |
| H  | 17.769783 | 9.683082  | 26.861227 |
| H  | 14.485600 | 11.761095 | 22.743219 |
| Ni | 13.296880 | 9.735409  | 23.500363 |
| C  | 11.791824 | 9.428298  | 22.128987 |
| H  | 13.235651 | 8.304887  | 23.646186 |
| C  | 13.059974 | 9.553070  | 21.541269 |
| H  | 13.583605 | 8.674124  | 21.156069 |
| H  | 13.364528 | 10.516116 | 21.120892 |
| C  | 11.072128 | 8.088678  | 22.264222 |
| H  | 10.806766 | 7.979130  | 23.333425 |
| C  | 9.758640  | 8.100874  | 21.477760 |

|   |           |           |           |
|---|-----------|-----------|-----------|
| H | 9.933479  | 8.318927  | 20.412530 |
| H | 9.274580  | 7.116427  | 21.533221 |
| H | 9.037634  | 8.836292  | 21.856627 |
| C | 10.927952 | 10.643796 | 22.286782 |
| H | 10.310212 | 10.590325 | 23.200691 |
| H | 11.522641 | 11.563182 | 22.306009 |
| H | 10.217636 | 10.726222 | 21.447409 |
| C | 11.895426 | 6.882264  | 21.849290 |
| H | 11.346909 | 5.953079  | 22.054598 |
| H | 12.111160 | 6.898084  | 20.769892 |
| H | 12.854684 | 6.818962  | 22.381568 |

## P

|    |           |           |           |
|----|-----------|-----------|-----------|
| C  | 10.482544 | 13.517259 | 23.859349 |
| C  | 13.495917 | 16.642094 | 23.854636 |
| C  | 16.909358 | 13.434763 | 23.954851 |
| C  | 10.368193 | 16.571681 | 26.878756 |
| C  | 13.610903 | 16.682558 | 30.227995 |
| C  | 16.948991 | 10.421979 | 26.991002 |
| C  | 13.577434 | 10.302560 | 30.245525 |
| C  | 16.707661 | 16.768011 | 27.232022 |
| C  | 10.521536 | 10.244937 | 27.157959 |
| C  | 16.745480 | 13.719082 | 30.304592 |
| C  | 10.415725 | 13.285823 | 30.195699 |
| O  | 13.729930 | 11.730587 | 23.313419 |
| Zr | 13.686441 | 13.482093 | 24.525448 |
| O  | 10.071423 | 13.408599 | 25.043410 |
| O  | 11.669728 | 13.575516 | 23.468209 |
| O  | 15.732879 | 13.426077 | 23.510752 |
| O  | 13.613348 | 15.456331 | 23.453685 |
| Zr | 13.728371 | 10.970831 | 27.083733 |
| Zr | 11.121251 | 13.413743 | 27.025223 |
| O  | 15.043490 | 14.941338 | 25.659020 |
| O  | 12.307462 | 12.000375 | 25.605749 |
| O  | 12.573802 | 14.493264 | 26.006598 |
| O  | 14.734457 | 12.476828 | 26.050838 |
| O  | 13.492567 | 17.044557 | 25.045077 |
| O  | 17.271180 | 13.542399 | 25.151015 |
| Zr | 13.554996 | 16.001980 | 27.048776 |
| Zr | 16.154146 | 13.569389 | 27.112153 |
| H  | 11.735090 | 11.427919 | 25.079348 |
| H  | 15.594782 | 15.523294 | 25.128387 |
| H  | 11.573541 | 15.417400 | 29.003978 |
| O  | 12.151610 | 14.874769 | 28.460363 |
| O  | 15.507782 | 17.130625 | 27.140171 |
| O  | 11.545320 | 17.008296 | 26.949986 |
| O  | 13.565266 | 17.076853 | 29.035468 |
| Zr | 13.590670 | 13.497154 | 29.585992 |
| O  | 14.626727 | 14.568980 | 28.123352 |
| H  | 15.647463 | 11.589000 | 29.085061 |

|    |           |           |           |
|----|-----------|-----------|-----------|
| O  | 15.082020 | 12.122580 | 28.519673 |
| O  | 11.716051 | 9.871734  | 27.195638 |
| O  | 15.783570 | 9.961292  | 27.074818 |
| O  | 13.678753 | 9.901779  | 29.057573 |
| O  | 12.604532 | 12.424698 | 28.098114 |
| O  | 17.172106 | 13.677343 | 29.123159 |
| O  | 17.149298 | 15.591630 | 27.193968 |
| O  | 17.294708 | 11.629667 | 27.053658 |
| O  | 10.029857 | 13.325128 | 29.001049 |
| O  | 10.096511 | 11.425850 | 27.045326 |
| O  | 9.998764  | 15.372040 | 26.933308 |
| O  | 13.586138 | 15.493844 | 30.636653 |
| O  | 13.567254 | 11.493945 | 30.644248 |
| O  | 15.551276 | 13.624328 | 30.685231 |
| O  | 11.597469 | 13.376808 | 30.616519 |
| O  | 13.806117 | 9.738847  | 25.303867 |
| H  | 13.997278 | 8.813020  | 25.490246 |
| H  | 9.746049  | 9.450383  | 27.222247 |
| H  | 9.695741  | 13.561156 | 23.072589 |
| H  | 13.395242 | 17.421360 | 23.068865 |
| H  | 13.498568 | 9.516695  | 31.026956 |
| H  | 13.670650 | 17.471873 | 31.007971 |
| H  | 17.461537 | 17.576012 | 27.348383 |
| H  | 17.509419 | 13.843178 | 31.101998 |
| H  | 9.625539  | 13.167550 | 30.967992 |
| H  | 17.721869 | 13.345606 | 23.200773 |
| H  | 9.566044  | 17.332224 | 26.764975 |
| H  | 17.768640 | 9.681855  | 26.863830 |
| H  | 14.605814 | 11.633653 | 22.921355 |
| Ni | 12.894776 | 9.931315  | 23.639915 |
| C  | 11.397482 | 10.405051 | 22.386565 |
| H  | 11.502273 | 11.495378 | 22.310082 |
| H  | 12.283140 | 8.641462  | 23.896374 |
| C  | 10.053999 | 9.906925  | 22.819830 |
| H  | 9.810617  | 10.307457 | 23.822873 |
| H  | 10.071623 | 8.810606  | 22.934114 |
| C  | 8.946944  | 10.315637 | 21.851588 |
| H  | 9.154501  | 9.877116  | 20.859346 |
| H  | 8.978290  | 11.408538 | 21.692855 |
| C  | 7.560042  | 9.909259  | 22.319506 |
| H  | 7.367428  | 10.360776 | 23.308358 |
| H  | 7.540792  | 8.819145  | 22.492528 |
| C  | 12.373930 | 9.640547  | 21.748467 |
| H  | 12.205123 | 8.581876  | 21.528514 |
| H  | 13.157573 | 10.133536 | 21.164763 |
| C  | 6.462217  | 10.297758 | 21.351615 |
| H  | 6.606539  | 9.829497  | 20.366523 |
| H  | 5.469831  | 9.996825  | 21.713326 |
| H  | 6.433413  | 11.385510 | 21.189197 |

## Q

|    |           |           |           |
|----|-----------|-----------|-----------|
| C  | 10.482659 | 13.517115 | 23.859515 |
| C  | 13.495744 | 16.642024 | 23.854689 |
| C  | 16.909412 | 13.434746 | 23.954968 |
| C  | 10.368197 | 16.571704 | 26.878732 |
| C  | 13.610902 | 16.682609 | 30.227990 |
| C  | 16.948954 | 10.421965 | 26.990931 |
| C  | 13.577374 | 10.302552 | 30.245408 |
| C  | 16.707709 | 16.768061 | 27.231993 |
| C  | 10.521532 | 10.245062 | 27.157857 |
| C  | 16.745530 | 13.719069 | 30.304611 |
| C  | 10.415729 | 13.285840 | 30.195692 |
| O  | 13.712084 | 11.730447 | 23.306115 |
| Zr | 13.685815 | 13.478129 | 24.533209 |
| O  | 10.070412 | 13.397596 | 25.043323 |
| O  | 11.669180 | 13.605734 | 23.476060 |
| O  | 15.732944 | 13.430966 | 23.508986 |
| O  | 13.621394 | 15.457083 | 23.454561 |
| Zr | 13.725776 | 10.973399 | 27.083419 |
| Zr | 11.114893 | 13.409100 | 27.019380 |
| O  | 15.043168 | 14.943953 | 25.661928 |
| O  | 12.322235 | 11.984951 | 25.590254 |
| O  | 12.574116 | 14.486553 | 26.010618 |
| O  | 14.741092 | 12.481525 | 26.054321 |
| O  | 13.487283 | 17.044095 | 25.045688 |
| O  | 17.270807 | 13.542484 | 25.151108 |
| Zr | 13.553624 | 16.001005 | 27.049309 |
| Zr | 16.154701 | 13.571708 | 27.113607 |
| H  | 11.820539 | 11.388507 | 25.022898 |
| H  | 15.590374 | 15.526211 | 25.127557 |
| H  | 11.572472 | 15.417037 | 29.003728 |
| O  | 12.149481 | 14.874272 | 28.459124 |
| O  | 15.507660 | 17.130288 | 27.141729 |
| O  | 11.545199 | 17.008122 | 26.950637 |
| O  | 13.564509 | 17.077216 | 29.035603 |
| Zr | 13.588346 | 13.497524 | 29.583554 |
| O  | 14.627018 | 14.570333 | 28.125204 |
| H  | 15.642609 | 11.589215 | 29.088567 |
| O  | 15.079704 | 12.121809 | 28.519772 |
| O  | 11.715327 | 9.871471  | 27.192838 |
| O  | 15.783782 | 9.958443  | 27.069985 |
| O  | 13.678099 | 9.900256  | 29.058234 |
| O  | 12.601563 | 12.427264 | 28.091387 |
| O  | 17.173261 | 13.676410 | 29.123634 |
| O  | 17.150516 | 15.592188 | 27.194867 |
| O  | 17.294210 | 11.628455 | 27.058836 |
| O  | 10.028808 | 13.326456 | 29.001398 |
| O  | 10.096520 | 11.426500 | 27.052950 |
| O  | 9.998551  | 15.371782 | 26.929197 |
| O  | 13.585053 | 15.493803 | 30.636400 |

|    |           |           |           |
|----|-----------|-----------|-----------|
| O  | 13.564740 | 11.494692 | 30.642549 |
| O  | 15.551045 | 13.624255 | 30.684254 |
| O  | 11.597748 | 13.375990 | 30.615924 |
| O  | 13.827117 | 9.736044  | 25.322199 |
| H  | 14.268725 | 8.899950  | 25.510505 |
| H  | 9.745312  | 9.450953  | 27.220001 |
| H  | 9.697957  | 13.543721 | 23.070532 |
| H  | 13.392893 | 17.421309 | 23.069143 |
| H  | 13.501112 | 9.518034  | 31.028567 |
| H  | 13.672232 | 17.471692 | 31.008116 |
| H  | 17.461316 | 17.576733 | 27.346331 |
| H  | 17.508795 | 13.843930 | 31.102625 |
| H  | 9.626062  | 13.167191 | 30.968521 |
| H  | 17.722248 | 13.341253 | 23.201699 |
| H  | 9.565885  | 17.332541 | 26.767845 |
| H  | 17.769413 | 9.682577  | 26.862404 |
| H  | 14.498615 | 11.775567 | 22.747704 |
| Ni | 13.325372 | 9.748139  | 23.482539 |
| H  | 13.252751 | 8.310818  | 23.604832 |
| C  | 11.146651 | 8.187878  | 22.203223 |
| H  | 10.673908 | 8.139466  | 23.200588 |
| H  | 11.869563 | 7.357439  | 22.176653 |
| C  | 10.077423 | 7.961271  | 21.135219 |
| H  | 10.524204 | 8.116082  | 20.137398 |
| H  | 9.287695  | 8.725235  | 21.225594 |
| C  | 9.458908  | 6.581574  | 21.219569 |
| H  | 8.987903  | 6.410691  | 22.198856 |
| H  | 8.685143  | 6.432640  | 20.454599 |
| H  | 10.211465 | 5.791203  | 21.082383 |
| C  | 11.017073 | 10.724902 | 22.069719 |
| H  | 10.349131 | 10.732678 | 22.948077 |
| H  | 11.603935 | 11.649425 | 22.059099 |
| H  | 10.354385 | 10.733599 | 21.187961 |
| C  | 11.877999 | 9.499638  | 22.048812 |
| C  | 13.178239 | 9.544150  | 21.521928 |
| H  | 13.665896 | 8.619521  | 21.197559 |
| H  | 13.550997 | 10.470298 | 21.073183 |

## S7. References

- 1 B. Yeh, S. P. Vicchio, S. Chheda, J. Zheng, J. Schmid, L. Löbbert, R. Bermejo-Deval, O. Y. Gutiérrez, J. A. Lercher, C. C. Lu, M. Neurock, R. B. Getman, L. Gagliardi and A. Bhan, *J. Am. Chem. Soc.*, 2021, **143**, 20274–20280.
- 2 R. Y. Brogaard and U. Olsbye, *ACS Catal.*, 2016, **6**, 1205–1214.
- 3 B. Yeh, S. Chheda, S. D. Prinslow, A. S. Hoffman, J. Hong, J. E. Perez-Aguilar, S. R. Bare, C. C. Lu, L. Gagliardi and A. Bhan, *J. Am. Chem. Soc.*, 2023, **145**, 3408–3418.
- 4 R. Y. Brogaard, M. K murcu, M. M. Dyballa, A. Botan, V. Van Speybroeck, U. Olsbye and K. De Wispelaere, *ACS Catal.*, 2019, **9**, 5645–5650.
- 5 A. S. Hoffman, J. A. Singh, S. F. Bent and S. R. Bare, *J. Synchrotron Radiat.*, 2018, **25**, 1673–1682.
- 6 J. Zheng, L. L bbert, S. Chheda, N. Khetrapal, J. Schmid, C. Alberto Gaggioli, B. Yeh, R. Bermejo-Deval, R. Kishan Motkuri, M. Balasubramanian, J. L. Fulton, O. Y. Guti rrez, J. Ilja Siepmann, M. Neurock, L. Gagliardi and J. A. Lercher, *J. Catal.*, 2022, **413**, 176–183.
- 7 V. Bernales, A. B. League, Z. Li, N. M. Schweitzer, A. W. Peters, R. K. Carlson, J. T. Hupp, C. J. Cramer, O. K. Farha and L. Gagliardi, *J. Phys. Chem. C*, 2016, **120**, 23576–23583.
- 8 J. Ye, L. Gagliardi, C. J. Cramer and D. G. Truhlar, *J. Catal.*, 2017, **354**, 278–286.
- 9 J. Ye, L. Gagliardi, C. J. Cramer and D. G. Truhlar, *J. Catal.*, 2018, **360**, 160–167.
- 10 E. D. Metzger, R. J. Comito, C. H. Hendon and M. Dinc , *J. Am. Chem. Soc.*, 2017, **139**, 757–762.
